# Supplementary material for: Survey of mitochondrial sequences integrated into the bovine nuclear genome
Source: PubMed Central journal article supplement (PMC7005759; doi:10.1038/s41598-020-59155-4), 2020-02-07
Supplement: 41598_2020_59155_MOESM1_ESM.pdf [file 41598_2020_59155_MOESM1_ESM.pdf]

1 **Survey of mitochondrial sequences integrated into the bovine nuclear genome**

2

3 Grau, E.T., Charles, M., Féménia, M., Rebours, E., Vaiman, A. and Rocha, D.

4

5 **Supplementary information**

6 **Table S1.** NUMT regions selected for validation.

7

8 **Table S2.** Estimation of the impact of *e*-value thresholds for alignments between nuclear assembly (UMD3.1.1 and  
9 ARS-UCD1.2) and standard mitogenome linearization using LAST.

10

11 **Table S3.** Number of alignment matches per chromosome and total length of the matches for the alignment between  
12 nuclear assembly (UMD3.1.1 and ARS-UCD1.2) and standard mitogenome linearization using LAST.

13

14 **Table S4.** List of all NUMT regions detected in the UMD\_3.1.1 and ARS-UCD1.2 genome assemblies using LAST.

15

16 **Table S5.** Summary of identified NUMT regions per chromosome.

17

18 **Table S6.** Information on NUMT regions identified on the ARS-UCD1.2 assembly using LAST compared with  
19 NUMT regions found using BLASTN with default parameters.

20

21 **Table S7.** Information on NUMT regions identified on the ARS-UCD1.2 Assembly using LAST compared with  
22 NUMT regions found using consolidated results of all BLAST searches.

23

24 **Table S8.** Repetitive sequences in NUMT regions per class and family.

25

26 **Table S9.** NUMT regions located within gene boundaries.

27

28 **Figure S1.** Dot plots of potentially highly modified NUMT regions.

29

30 **Figure S2.** Alignment between NUMT regions ARS\_10.7 and ARS\_10.8, including 500 bp up- and downstream of

31 each region. Sequence from ARS-UCD1.2 assembly was used, and repetitive sequences were marked in gray.

32

33 **Figure S3.** Alignment between NUMT regions ARS\_18.6, ARS\_18.7 and ARS\_18.8, including 500 bp up- and  
34 downstream of each region. Sequence from ARS-UCD1.2 assembly was used, and repetitive sequences were  
35 marked in gray.

36

37 **Figure S4.** PCR amplification of 29 NUMT regions with genomic DNA from L1 Dominette 01449.

38

39 **Figure S5.** PCR amplification of 12 NUMT regions with genomic DNA from Dominette and other 7 breeds in a  
40 total of 17 animals.

41

42 **Figure S6.** Alignment of sequences obtained for amplicon UMD\_15.B. The consensus sequence is 100% identical  
43 to the ARS-UCD1.2 genome assembly reference sequence (chromosome 15, positions 6050827-6051676).

44 AUB, Aubrac; BLA, Blonde d'Aquitaine; HOL, Holstein; MON, Montbéliarde, NOR, Normande

45 F and R indicate the forward and reverse DNA strand, respectively, while the + and – symbols indicate that the

46 DNA sequence is aligned in the same orientation (+) or in the reverse-complementary orientation (-).

47 **Table S1.** NUMT regions selected for validation.

| NUMT regions     |                       |             | Samples information |         |                     | Amplicon length (bp) | Forward primer 5'-3' - Position and Sequence [data from UMD3.1.1 assembly] | Reverse Primer 5'-3' - Position and Sequence [data from UMD3.1.1 assembly] |
|------------------|-----------------------|-------------|---------------------|---------|---------------------|----------------------|----------------------------------------------------------------------------|----------------------------------------------------------------------------|
| CHR <sup>1</sup> | Identification        | Length (bp) | Dominette           | Animals | Breeds <sup>3</sup> |                      |                                                                            |                                                                            |
| 28               | UMD_28.2              | 396         | yes                 | 17      | 8                   | 718                  | 2048957 AGGTGGGTAACGTGGCTGAGAT 2048978                                     | 2049674 CATGTCCGAGGCCACACGGT 2049655                                       |
| 1                | UMD_1.5               | 384         | yes                 | 17      | 8                   | 749                  | 113122818 GTGGAAGTGAAGGGGCATGGCT 113122839                                 | 113123566 GCTCAGAGAAATGGGATGTCGTGGA 113123542                              |
| 27               | UMD_27.1              | 326         | yes                 | 17      | 8                   | 783                  | 4524499 AAATCCGTGCAGGGGTGGG 4524518                                        | 4525281 GGCTTCCGAGGACTGCTGG 4525262                                        |
| 14               | UMD_14.1              | 363         | yes                 | 17      | 8                   | 784                  | 7337216 TTCTGCCACAGCAACCCACT 7337236                                       | 7337999 ACACCTACTGCACCTGACGTGAC 7337977                                    |
| 8                | UMD_8.6               | 547         | yes                 | 17      | 8                   | 823                  | 97773677 TCCGGGTGTCCAGATGAGGCT 97773697                                    | 97774499 ACAGTGCTCAGTGTGGGGGC 97774480                                     |
| 2                | UMD_2.5               | 343         | yes                 | 17      | 8                   | 825                  | 6415171 CACAACCACCATCCCACTAA 6415191                                       | 6415995 TGGTGGGTTTGGAGGAGTAGGTA 6415973                                    |
| 10               | UMD_10.8              | 350         | yes                 | 17      | 8                   | 899                  | 51465075 ACTACATAACAATGCACACCACAC 51465098                                 | 51465976 GCATCAAAAAGTGCCAGGTC 51465956                                     |
| 15               | UMD.15.B <sup>2</sup> | 334         | yes                 | 17      | 8                   | 900                  | 6297509 TGGGGAGACCCAGAATTGCC 6297528                                       | 6298408 ACCAAAGCTACTTCCTATCTTCA 6298385                                    |
| 15               | UMD_15.7              | 103         | yes                 | 17      | 8                   | 900                  | 6883893 CTCTCGATCGTTGTAGCATCT 68839003                                     | 68839882 GGCAAGTTTTGCATTTATTACCA 68839858                                  |
| 11               | UMD_11.3              | 531         | yes                 | 17      | 8                   | 1851                 | 58229105 GAATGGAAGGCTTTCACCAGGCT 58229127                                  | 58230955 GGCCTATCTGCTCATCACCACAAA 58230931                                 |
| 20               | UMD_20.1              | 1383        | yes                 | 1       | 1                   | 2065                 | 6503632 ACAGTCCAGACTCCACATACTTT 6503656                                    | 6505696 GGTGGCACATTGTATGTCAGCCA 6505673                                    |
| 18               | UMD_18.9              | 1272        | yes                 | 17      | 8                   | 2565                 | 60175352 GCGAAACATTCCTACTTACACAGTTCAG 60175380                             | 60177916 ATCAGGGGTCCGAAGGGGG 60177897                                      |
| 4                | UMD_4.5               | 1141        | yes                 | 17      | 8                   | 2665                 | 37508716 AACGCATTTACGATGTGGAGG 37508738                                    | 37511380 TGTTGACATCTCTGCTGATGATTACG 37511355                               |
| 2                | UMD_2.4               | 1613        | yes                 | 1       | 1                   | 2812                 | 4728910 ACCAATCCAATGTGGAGGCCCTT 4728932                                    | 4731721 CCTCTGCAAAAATGCTTCCTCTCA 4731697                                   |
| 24               | UMD_24.7              | 1883        | yes                 | 1       | 1                   | 3170                 | 53676714 TGAGCAGAGGAAGATTTCAGTTCA 53676737                                 | 53679883 TTCCGTATAATCCTGTGGTCAA 53679861                                   |
| 8                | UMD_8.4               | 1852        | yes                 | 1       | 1                   | 3353                 | 55007160 TTGCCCTACTCCTCATCCCCAGGA 55007183                                 | 55010512 AGATGGTCCAAGCCCAGACCCA 55010490                                   |
| 6                | UMD_6.3               | 2727        | yes                 | 1       | 1                   | 3779                 | 72653070 TCCCTTGACTCCAAAAGGGACCA 72653092                                  | 72656848 GAGTTGGGGAAATTAGAGGGAGGT 72656824                                 |
| 3                | UMD_3.1               | 3007        | yes                 | 1       | 1                   | 3781                 | 91386327 TCAGAACAGCTGGAGGCTTG 91386346                                     | 91390107 CTATGTAAGTACAGTAGCCTGAGT 91390084                                 |
| 15               | UMD_15.2              | 1752        | yes                 | 1       | 1                   | 4268                 | 33729281 TCAGAACCCCCAGAAGTTGC 33729300                                     | 33733548 AGTGTAGATTGGAATGTGGGATT 33733524                                  |
| 18               | UMD_18.4              | 3048        | yes                 | 1       | 1                   | 4353                 | 39742211 CCGGGAACGCCCTGTAAAC 39742231                                      | 39746563 AGCTGAGTCCCAGCATCTGCTCAA 39746539                                 |
| 5                | UMD_5.1               | 4135        | yes                 | 1       | 1                   | 4426                 | 17541799 TGGGAAGCCCCTAATTCAAACTAC 17541822                                 | 17546224 TTCTGGCCAGAGGTC AATGTG 17546203                                   |
| 24               | UMD_24.6              | 2712        | yes                 | 1       | 1                   | 4476                 | 44095212 CCATCGCTGGGGCTTCCACAT 44095234                                    | 44099687 ACTGGCCAAGTCCAGGGATGC 44099667                                    |
| X                | UMD_X.2               | 1368        | yes                 | 1       | 1                   | 4695                 | 41218405 AAGGAAACTGGTGGGTCCAT 41218427                                     | 41223099 TGCCGTGCTCTATACAGTCAAATG 41223075                                 |
| 2                | UMD_2.3               | 4903        | yes                 | 1       | 1                   | 5744                 | 3313398 ATCTGTGGACCTGGGGAGTCCAG 3313420                                    | 3319141 GCGGGCTCCAGAAGACTCTCCAT 3319119                                    |
| 10               | UMD_10.1              | 4537        | yes                 | 1       | 1                   | 7200                 | 4971655 AGCCACACAACCACAGTCA 4971675                                        | 4978854 GTTGGTGTGGTGTCTACTGACT 4978832                                     |
| 12               | UMD_12.4              | 1301        | yes                 | 1       | 1                   | 8114                 | 37060839 CCAAGGAAACTGCGTCCAT 37060858                                      | 37068952 GGGGATCCACAGGCATATACAG 37068930                                   |
| 4                | UMD_4.9               | 7999        | yes                 | 1       | 1                   | 8452                 | 99612052 CTCGCTCCCGCAAGTGGGA 99612071                                      | 99620503 GCCATAATGCCCTGCCAAATCCCC 99620479                                 |
| 10               | UMD_10.10             | 10457       | yes                 | 1       | 1                   | 13162                | 63957687 CTTGCTGTGTGGCTTCTATGAGGA 63957711                                 | 63970814 GGCACAAGTGGTCACTGTGTTA 63970792                                   |
| 2                | UMD_2.11              | 9632        | yes                 | 1       | 1                   | 13274                | 90490992 TGTCAGCCTGGAAGTCAATGCA 90491015                                   | 90504265 AGGCAACTCACAGTAGCACCAGG 90504243                                  |

48 <sup>1</sup> CHR was used for chromosome.

49 <sup>2</sup> NUMT region detected using BLAST on UMD3.1.1 during preliminary study (personal data). Location: CHR15:6297989-6298323 on UMD3.1.1.

50 <sup>3</sup> Breeds: Hereford (1), Montbéliarde (3), Holstein (3), Normande (2), Limousine (1), Salers (2), Blonde d'Aquitaine (3, and Aubrac (2). Number of samples between brackets.

51 **Table S2.** Estimation of the impact of *e*-value thresholds for the alignments between nuclear assembly  
 52 (UMD3.1.1 and ARS-UCD1.2) and standard mitogenome linearization linearization using  
 53 LAST.

54

| <i>e</i> -value Filter <sup>1</sup> | Alignment matches information <sup>2</sup> |                           |                                  |                            |                         |                           |
|-------------------------------------|--------------------------------------------|---------------------------|----------------------------------|----------------------------|-------------------------|---------------------------|
|                                     | Number <sup>3</sup>                        | Length (kbp) <sup>4</sup> | Mitochondrial (kbp) <sup>5</sup> | Nuclear (kbp) <sup>6</sup> | Gaps (kbp) <sup>7</sup> | Identity (%) <sup>8</sup> |
| < 10 <sup>-2</sup>                  | 434                                        | 242.1                     | 240.3                            | 236.9                      | 2.0                     | 77.9%                     |
|                                     | 446                                        | 245.4                     | 243.7                            | 240.0                      | 2.1                     | 78.2%                     |
| < 10 <sup>-3</sup>                  | 429                                        | 241.8                     | 240.1                            | 236.6                      | 2.0                     | 77.9%                     |
|                                     | 441                                        | 245.1                     | 243.4                            | 239.7                      | 2.1                     | 78.2%                     |
| < 10 <sup>-4</sup>                  | 426                                        | 241.5                     | 239.8                            | 236.3                      | 2.0                     | 77.9%                     |
|                                     | 439                                        | 244.9                     | 243.2                            | 239.6                      | 2.1                     | 78.2%                     |
| < 10 <sup>-5</sup>                  | 417                                        | 240.7                     | 239.0                            | 235.5                      | 2.0                     | 77.9%                     |
|                                     | 431                                        | 244.3                     | 242.6                            | 239.0                      | 2.1                     | 78.2%                     |

55

56 *1 e-value filter used to select the alignments to be analyzed.*

57 *2 Within each cell, values on top refer to assembly ARS-UCD1.2 and values on bottom refer to*  
 58 *assembly UMD3.1.1.*

59 *3 Number of alignment matches detected.*

60 *4 Total length of alignment matches.*

61 *5 Total length of mitochondrial genome aligned.*

62 *6 Total length of nuclear genome aligned.*

63 *7 Total length of alignment gaps.*

64 *8 Identity between mitochondrial and NUMT regions sequences.*

65

66 **Table S3.** Number of alignment matches per chromosome and total length of the matches for the alignment  
67 between nuclear assembly (UMD3.1.1 and ARS-UCD1.2) and the standard mitogenome  
68 linearization using LAST.  
69

| Chromosome            | UMD3.1.1          |                                 | ARS-UCD1.2        |                                 | Differences between the results of both assemblies |           |              |           |
|-----------------------|-------------------|---------------------------------|-------------------|---------------------------------|----------------------------------------------------|-----------|--------------|-----------|
|                       | Number of matches | Total length (kbp) <sup>1</sup> | Number of matches | Total length (kbp) <sup>1</sup> | Number of matches                                  |           | Length (kbp) |           |
| 1                     | 31                | 17,397                          | 31                | 17,397                          | 0                                                  | 0%        | 0            | 0%        |
| 2                     | 33                | 23,292                          | 32                | 23,453                          | 1                                                  | 3%        | 161          | 1%        |
| 3                     | 5                 | 3,869                           | 5                 | 3,869                           | 0                                                  | 0%        | 0            | 0%        |
| 4                     | 26                | 9,207                           | 26                | 9,479                           | 0                                                  | 0%        | 272          | 3%        |
| 5                     | 8                 | 4,682                           | 8                 | 4,682                           | 0                                                  | 0%        | 0            | 0%        |
| 6                     | 4                 | 3,318                           | 4                 | 3,318                           | 0                                                  | 0%        | 0            | 0%        |
| 7                     | 7                 | 1,460                           | 7                 | 1,460                           | 0                                                  | 0%        | 0            | 0%        |
| 8                     | 6                 | 3,014                           | 6                 | 3,014                           | 0                                                  | 0%        | 0            | 0%        |
| 9                     | 11                | 10,469                          | 10                | 11,356                          | 1                                                  | 9%        | 887          | 8%        |
| 10                    | 52                | 26,206                          | 50                | 26,230                          | 2                                                  | 4%        | 24           | 0%        |
| 11                    | 25                | 12,443                          | 25                | 13,077                          | 0                                                  | 0%        | 634          | 5%        |
| 12                    | 8                 | 2,298                           | 7                 | 1,779                           | 1                                                  | 13%       | 519          | 23%       |
| 13                    | 13                | 3,502                           | 14                | 3,743                           | 1                                                  | 8%        | 241          | 7%        |
| 14                    | 9                 | 3,128                           | 9                 | 3,128                           | 0                                                  | 0%        | 0            | 0%        |
| 15                    | 16                | 7,542                           | 17                | 7,777                           | 1                                                  | 6%        | 235          | 3%        |
| 16                    | 11                | 9,192                           | 9                 | 12,912                          | 2                                                  | 18%       | 3,720        | 40%       |
| 17                    | 19                | 9,926                           | 18                | 8,843                           | 1                                                  | 5%        | 1,083        | 11%       |
| 18                    | 14                | 4,044                           | 13                | 3,340                           | 1                                                  | 7%        | 704          | 17%       |
| 19                    | 4                 | 1,954                           | 3                 | 626                             | 1                                                  | 25%       | 1,328        | 68%       |
| 20                    | 13                | 4,657                           | 13                | 4,658                           | 0                                                  | 0%        | 1            | 0%        |
| 21                    | 3                 | 444                             | 3                 | 444                             | 0                                                  | 0%        | 0            | 0%        |
| 22                    | 35                | 23,800                          | 34                | 22,699                          | 1                                                  | 3%        | 1,101        | 5%        |
| 23                    | -                 | -                               | -                 | -                               | -                                                  | -         | -            | -         |
| 24                    | 15                | 8,664                           | 13                | 9,134                           | 2                                                  | 13%       | 470          | 5%        |
| 25                    | 1                 | 491                             | -                 | -                               | 1                                                  | 100%      | 491          | 100%      |
| 26                    | 12                | 5,274                           | 11                | 5,080                           | 1                                                  | 8%        | 194          | 4%        |
| 27                    | 3                 | 577                             | 3                 | 577                             | 0                                                  | 0%        | 0            | 0%        |
| 28                    | 34                | 19,754                          | 33                | 19,289                          | 1                                                  | 3%        | 465          | 2%        |
| 29                    | 4                 | 1,069                           | 4                 | 1,069                           | 0                                                  | 0%        | 0            | 0%        |
| X                     | 15                | 17,126                          | 9                 | 8,444                           | 6                                                  | 40%       | 8,682        | 51%       |
| Unplaced <sup>2</sup> | 2                 | 792                             | 9                 | 5,383                           | 7                                                  | 350%      | 4,591        | 580%      |
| <b>Total</b>          | <b>439</b>        | <b>239,591</b>                  | <b>426</b>        | <b>236,260</b>                  | <b>13</b>                                          | <b>3%</b> | <b>3,331</b> | <b>1%</b> |

70  
71 *1 The "total length" was calculated by summing the length of the alignment matches, per chromosome.*  
72 *2 Unplaced scaffolds. These alignments were not used for the NUMT region detection.*  
73

74 **Table S4.** List of all NUMT regions detected in the UMD\_3.1.1 and ARS-UCD1.2 genome assemblies  
75 using LAST.  
76

| UMD_3.1.1   |                  |                |              |                          | ARS-UCD1.2  |                  |                |              |                          |
|-------------|------------------|----------------|--------------|--------------------------|-------------|------------------|----------------|--------------|--------------------------|
| NUMT region | CHR <sup>1</sup> | Start position | End position | Length (bp) <sup>2</sup> | NUMT region | CHR <sup>1</sup> | Start position | End position | Length (bp) <sup>2</sup> |
| UMD_1.1     | 1                | 12811430       | 12820694     | 9265                     | ARS_1.1     | 1                | 13401385       | 13410648     | 9264                     |
| UMD_1.2     | 1                | 32469929       | 32470337     | 409                      | ARS_1.2     | 1                | 32903076       | 32903484     | 409                      |
| UMD_1.3     | 1                | 74649203       | 74649317     | 115                      | ARS_1.3     | 1                | 74038942       | 74039056     | 115                      |
| UMD_1.4     | 1                | 95764899       | 95764975     | 77                       | ARS_1.4     | 1                | 94998201       | 94998277     | 77                       |
| UMD_1.5     | 1                | 113123100      | 113123483    | 384                      | ARS_1.5     | 1                | 112219471      | 112219854    | 384                      |
| UMD_1.6     | 1                | 115885591      | 115885645    | 55                       | ARS_1.6     | 1                | 114959465      | 114959519    | 55                       |
| UMD_1.7     | 1                | 117471891      | 117496262    | 24372                    | ARS_1.7     | 1                | 116533243      | 116557613    | 24371                    |
| UMD_1.8     | 1                | 122191272      | 122193709    | 2438                     | ARS_1.8     | 1                | 121223372      | 121225803    | 2432                     |
| UMD_1.9     | 1                | 133413306      | 133413746    | 441                      | ARS_1.9     | 1                | 132309962      | 132310402    | 441                      |
| UMD_1.10    | 1                | 138756116      | 138758547    | 2432                     | ARS_1.10    | 1                | 156921322      | 156923753    | 2432                     |
| UMD_2.1     | 2                | 1357968        | 1358718      | 751                      | ARS_2.1     | 2                | 1427787        | 1428537      | 751                      |
| UMD_2.2     | 2                | 2015595        | 2030298      | 14704                    | ARS_2.2     | 2                | 2085710        | 2100413      | 14704                    |
| UMD_2.3     | 2                | 3313866        | 3318768      | 4903                     | ARS_2.3     | 2                | 3386219        | 3391182      | 4964                     |
| UMD_2.4     | 2                | 4729846        | 4731458      | 1613                     | ARS_2.4     | 2                | 4797610        | 4799222      | 1613                     |
| UMD_2.5     | 2                | 6415574        | 6415916      | 343                      | ARS_2.5     | 2                | 6480665        | 6481007      | 343                      |
| UMD_2.6     | 2                | 22686429       | 22686934     | 506                      | ARS_2.6     | 2                | 22650482       | 22650987     | 506                      |
| UMD_2.7     | 2                | 40740974       | 40741257     | 284                      | ARS_2.7     | 2                | 40600460       | 40600743     | 284                      |
| UMD_2.8     | 2                | 52774170       | 52774309     | 140                      | ARS_2.8     | 2                | 52673849       | 52673988     | 140                      |
| UMD_2.9     | 2                | 67011643       | 67011700     | 58                       | ARS_2.9     | 2                | 66659803       | 66659860     | 58                       |
| UMD_2.10    | 2                | 85335357       | 85336095     | 739                      | ARS_2.10    | 2                | 84940388       | 84941126     | 739                      |
| UMD_2.11    | 2                | 90493431       | 90503062     | 9632                     | ARS_2.11    | 2                | 90077160       | 90086791     | 9632                     |
| UMD_2.12    | 2                | 104605082      | 104605197    | 116                      | ARS_2.12    | 2                | 104083158      | 104083273    | 116                      |
| UMD_2.13    | 2                | 107186195      | 107186386    | 192                      | ARS_2.13    | 2                | 106463510      | 106463701    | 192                      |
| UMD_2.14    | 2                | 129504072      | 129504239    | 168                      | ARS_2.14    | 2                | 128905747      | 128905914    | 168                      |
| UMD_2.15    | 2                | 136691052      | 136691229    | 178                      | ARS_2.15    | 2                | 136110007      | 136110184    | 178                      |
| UMD_3.1     | 3                | 91386578       | 91389584     | 3007                     | ARS_3.1     | 3                | 90809110       | 90812116     | 3007                     |
| UMD_3.2     | 3                | 99796429       | 99796564     | 136                      | ARS_3.2     | 3                | 99198342       | 99198477     | 136                      |
| UMD_3.3     | 3                | 99828551       | 99828872     | 322                      | ARS_3.3     | 3                | 99230430       | 99230751     | 322                      |
| UMD_3.4     | 3                | 99862510       | 99862837     | 328                      | ARS_3.4     | 3                | 99264028       | 99264355     | 328                      |
| UMD_3.5     | 3                | 103779161      | 103779236    | 76                       | ARS_3.5     | 3                | 103184780      | 103184855    | 76                       |
| UMD_4.1     | 4                | 5284020        | 5284709      | 690                      | ARS_4.1     | 4                | 5366685        | 5367374      | 690                      |
| UMD_4.2     | 4                | 19690600       | 19690716     | 117                      | ARS_4.2     | 4                | 19758601       | 19758717     | 117                      |
| UMD_4.3     | 4                | 24277775       | 24291164     | 13390                    | ARS_4.3     | 4                | 24333569       | 24346570     | 13002                    |
| UMD_4.4     | 4                | 24601057       | 24601170     | 114                      | ARS_4.4     | 4                | 24652762       | 24652875     | 114                      |
| UMD_4.5     | 4                | 37508943       | 37510083     | 1141                     | ARS_4.5     | 4                | 37325762       | 37326902     | 1141                     |
| UMD_4.6     | 4                | 42683450       | 42683517     | 68                       | ARS_4.6     | 4                | 42448079       | 42448146     | 68                       |
| UMD_4.7     | 4                | 56686497       | 56687568     | 1072                     | ARS_4.7     | 4                | 56374325       | 56375395     | 1071                     |
| UMD_4.8     | 4                | 80975436       | 80975612     | 177                      | ARS_4.8     | 4                | 80267172       | 80267348     | 177                      |
| UMD_4.9     | 4                | 99612082       | 99620080     | 7999                     | ARS_4.9     | 4                | 98710770       | 98718689     | 7920                     |

|           |    |           |           |       |           |    |           |           |       |
|-----------|----|-----------|-----------|-------|-----------|----|-----------|-----------|-------|
| UMD_4.10  | 4  | 104872550 | 104872620 | 71    | ARS_4.10  | 4  | 104035179 | 104035249 | 71    |
| UMD_4.11  | 4  | 120003757 | 120003811 | 55    | ARS_4.11  | 4  | 119203491 | 119203545 | 55    |
| UMD_5.1   | 5  | 17541842  | 17545976  | 4135  | ARS_5.1   | 5  | 17464784  | 17468918  | 4135  |
| UMD_5.2   | 5  | 43409831  | 43410003  | 173   | ARS_5.2   | 5  | 43182930  | 43183102  | 173   |
| UMD_5.3   | 5  | 85264122  | 85268921  | 4800  | ARS_5.3   | 5  | 84845707  | 84850507  | 4801  |
| UMD_6.1   | 6  | 35551068  | 35551463  | 396   | ARS_6.1   | 6  | 34113156  | 34113551  | 396   |
| UMD_6.2   | 6  | 66521568  | 66521661  | 94    | ARS_6.2   | 6  | 64877892  | 64877985  | 94    |
| UMD_6.3   | 6  | 72653617  | 72656343  | 2727  | ARS_6.3   | 6  | 70953991  | 70956717  | 2727  |
| UMD_6.4   | 6  | 107492381 | 107492481 | 101   | ARS_6.4   | 6  | 104868249 | 104868349 | 101   |
| UMD_7.1   | 7  | 44153787  | 44156091  | 2305  | ARS_7.1   | 7  | 42715220  | 42717524  | 2305  |
| UMD_7.2   | 7  | 45968958  | 45973186  | 4229  | ARS_7.2   | 7  | 44347242  | 44351470  | 4229  |
| UMD_7.3   | 7  | 88353467  | 88353764  | 298   | ARS_7.3   | 7  | 86001941  | 86002238  | 298   |
| UMD_7.4   | 7  | 89248312  | 89248475  | 164   | ARS_7.4   | 7  | 86894023  | 86894186  | 164   |
| UMD_8.1   | 8  | 12388363  | 12388710  | 348   | ARS_8.1   | 8  | 12480290  | 12480637  | 348   |
| UMD_8.2   | 8  | 22028929  | 22028995  | 67    | ARS_8.2   | 8  | 21996578  | 21996644  | 67    |
| UMD_8.3   | 8  | 43163618  | 43163741  | 124   | ARS_8.3   | 8  | 42880668  | 42880791  | 124   |
| UMD_8.4   | 8  | 55007988  | 55009839  | 1852  | ARS_8.4   | 8  | 54721070  | 54722921  | 1852  |
| UMD_8.5   | 8  | 66314774  | 66314849  | 76    | ARS_8.5   | 8  | 65836070  | 65836145  | 76    |
| UMD_8.6   | 8  | 97773915  | 97774461  | 547   | ARS_8.6   | 8  | 96101997  | 96102543  | 547   |
| UMD_9.1   | 9  | 4693464   | 4704097   | 10634 | ARS_9.1   | 9  | 4620016   | 4631438   | 11423 |
| UMD_9.2   | 9  | 21020735  | 21020830  | 96    | ARS_9.2   | 9  | 20771910  | 20772005  | 96    |
| UMD_9.3   | 9  | 30950148  | 30950302  | 155   | ARS_9.3   | 9  | 30557292  | 30557446  | 155   |
| UMD_9.4   | 9  | 87842916  | 87843164  | 249   | ARS_9.4   | 9  | 86696116  | 86696365  | 250   |
| UMD_9.5   | 9  | 89091682  | 89091957  | 276   | ARS_9.5   | 9  | 87933259  | 87933534  | 276   |
| UMD_10.1  | 10 | 4973487   | 4978023   | 4537  | ARS_10.1  | 10 | 5035087   | 5039122   | 4036  |
| UMD_10.2  | 10 | 11212244  | 11212475  | 232   | ARS_10.2  | 10 | 11272763  | 11272994  | 232   |
| UMD_10.3  | 10 | 19790980  | 19791487  | 508   | ARS_10.3  | 10 | 19956795  | 19957302  | 508   |
| UMD_10.4  | 10 | 44933995  | 44952004  | 18010 | ARS_10.4  | 10 | 44886476  | 44904484  | 18009 |
| UMD_10.5  | 10 | 47869493  | 47871116  | 1624  | ARS_10.5  | 10 | 47816150  | 47817773  | 1624  |
| UMD_10.6  | 10 | 50586732  | 50592503  | 5772  | ARS_10.6  | 10 | 50516649  | 50522420  | 5772  |
| UMD_10.7  | 10 | 50963865  | 50964197  | 333   | ARS_10.7  | 10 | 50901742  | 50902074  | 333   |
| UMD_10.8  | 10 | 51465531  | 51465880  | 350   | ARS_10.8  | 10 | 51403811  | 51404160  | 350   |
| UMD_10.9  | 10 | 55795335  | 55801211  | 5877  | ARS_10.9  | 10 | 55715617  | 55721487  | 5871  |
| UMD_10.10 | 10 | 63958493  | 63968949  | 10457 | ARS_10.10 | 10 | 63725820  | 63736276  | 10457 |
| UMD_10.11 | 10 | 65676073  | 65681035  | 4963  | ARS_10.11 | 10 | 65448422  | 65453384  | 4963  |
| UMD_10.12 | 10 | 65735813  | 65736354  | 542   | ARS_10.12 | 10 | 65508161  | 65508702  | 542   |
| UMD_10.13 | 10 | 69298230  | 69298799  | 570   | ARS_10.13 | 10 | 69055010  | 69055662  | 653   |
| UMD_10.14 | 10 | 82440863  | 82440933  | 71    | ARS_10.14 | 10 | 82074954  | 82075024  | 71    |
| UMD_11.1  | 11 | 6127471   | 6127540   | 70    | ARS_11.1  | 11 | 6096889   | 6096958   | 70    |
| UMD_11.2  | 11 | 45647014  | 45675229  | 28216 | ARS_11.2  | 11 | 45785205  | 45814229  | 29025 |
| UMD_11.3  | 11 | 58229679  | 58230209  | 531   | ARS_11.3  | 11 | 58306700  | 58307230  | 531   |
| UMD_11.4  | 11 | 66128143  | 66128308  | 166   | ARS_11.4  | 11 | 66151403  | 66151568  | 166   |
| UMD_12.1  | 12 | 1297272   | 1297488   | 217   | ARS_12.1  | 12 | 1361751   | 1361967   | 217   |
| UMD_12.2  | 12 | 14909867  | 14909937  | 71    | ARS_12.2  | 12 | 14863282  | 14863352  | 71    |
| UMD_12.3  | 12 | 21537809  | 21537951  | 143   | ARS_12.3  | 12 | 21466683  | 21466825  | 143   |
| UMD_12.4  | 12 | 37062275  | 37063575  | 1301  | ARS_12.4  | 12 | 36803416  | 36804716  | 1301  |

|          |    |          |          |       |          |    |          |          |       |
|----------|----|----------|----------|-------|----------|----|----------|----------|-------|
| UMD_12.5 | 12 | 44437284 | 44437499 | 216   | ARS_12.5 | 12 | 44140180 | 44140395 | 216   |
| UMD_12.6 | 12 | 48951951 | 48952017 | 67    | ARS_12.6 | 12 | 48646882 | 48646948 | 67    |
| UMD_12.7 | 12 | 91161677 | 91162195 | 519   | -        | -  | -        | -        | -     |
| UMD_13.1 | 13 | 11651632 | 11661620 | 9989  | ARS_13.1 | 13 | 11595615 | 11607830 | 12216 |
| UMD_13.2 | 13 | 42209273 | 42209430 | 158   | ARS_13.2 | 13 | 41843382 | 41843539 | 158   |
| UMD_13.3 | 13 | 47449835 | 47449946 | 112   | ARS_13.3 | 13 | 47091490 | 47091601 | 112   |
| UMD_13.4 | 13 | 54093728 | 54093913 | 186   | ARS_13.4 | 13 | 53620969 | 53621154 | 186   |
| UMD_13.5 | 13 | 54109271 | 54109473 | 203   | ARS_13.5 | 13 | 53636512 | 53636714 | 203   |
| UMD_13.6 | 13 | 54121640 | 54121752 | 113   | ARS_13.6 | 13 | 53648881 | 53648993 | 113   |
| UMD_14.1 | 14 | 7337446  | 7337808  | 363   | ARS_14.1 | 14 | 6297951  | 6298313  | 363   |
| UMD_14.2 | 14 | 20558273 | 20559126 | 854   | ARS_14.2 | 14 | 18948380 | 18949233 | 854   |
| UMD_14.3 | 14 | 20574557 | 20576908 | 2352  | ARS_14.3 | 14 | 18964070 | 18966421 | 2352  |
| UMD_14.4 | 14 | 31524626 | 31525035 | 410   | ARS_14.4 | 14 | 29829010 | 29829419 | 410   |
| UMD_14.5 | 14 | 41687095 | 41688956 | 1862  | ARS_14.5 | 14 | 39548096 | 39549957 | 1862  |
| UMD_15.1 | 15 | 5525096  | 5525335  | 240   | ARS_15.1 | 15 | 5284235  | 5284474  | 240   |
| UMD_15.2 | 15 | 33730018 | 33731769 | 1752  | ARS_15.2 | 15 | 33195471 | 33197222 | 1752  |
| UMD_15.3 | 15 | 42340458 | 42340537 | 80    | ARS_15.3 | 15 | 41775778 | 41775857 | 80    |
| UMD_15.4 | 15 | 43500972 | 43502691 | 1720  | ARS_15.4 | 15 | 42909504 | 42911223 | 1720  |
| UMD_15.5 | 15 | 48377742 | 48378262 | 521   | ARS_15.5 | 15 | 47709837 | 47710357 | 521   |
| UMD_15.6 | 15 | 57413543 | 57418838 | 5296  | ARS_15.6 | 15 | 56630034 | 56635329 | 5296  |
| UMD_15.7 | 15 | 68839014 | 68839116 | 103   | ARS_15.7 | 15 | 68011884 | 68011986 | 103   |
| -        | -  | -        | -        | -     | ARS_15.8 | 15 | 83957438 | 83957672 | 235   |
| UMD_16.1 | 16 | 619485   | 627782   | 8298  | ARS_16.1 | 16 | 817986   | 829794   | 11809 |
| UMD_16.2 | 16 | 11534531 | 11534736 | 206   | ARS_16.2 | 16 | 10919931 | 10920136 | 206   |
| UMD_16.3 | 16 | 35580599 | 35580890 | 292   | ARS_16.3 | 16 | 34799081 | 34799372 | 292   |
| UMD_16.4 | 16 | 39494946 | 39501585 | 6640  | ARS_16.4 | 16 | 38638713 | 38645352 | 6640  |
| UMD_16.5 | 16 | 71896700 | 71896821 | 122   | ARS_16.5 | 16 | 70006735 | 70006856 | 122   |
| UMD_16.6 | 16 | 81557560 | 81557701 | 142   | ARS_16.6 | 16 | 79837757 | 79837898 | 142   |
| UMD_17.1 | 17 | 121482   | 123436   | 1955  | ARS_17.1 | 17 | 143331   | 143787   | 457   |
| UMD_17.2 | 17 | 44439910 | 44441071 | 1162  | ARS_17.2 | 17 | 5546577  | 5546915  | 339   |
| UMD_17.3 | 17 | 58913228 | 58926699 | 13472 | ARS_17.3 | 17 | 56657147 | 56670617 | 13471 |
| UMD_17.4 | 17 | 75066179 | 75066305 | 127   | ARS_17.4 | 17 | 73028819 | 73028945 | 127   |
| UMD_18.1 | 18 | 14608737 | 14608829 | 93    | ARS_18.1 | 18 | 14566459 | 14566551 | 93    |
| UMD_18.2 | 18 | 18842220 | 18842923 | 704   | -        | -  | -        | -        | -     |
| UMD_18.3 | 18 | 27844259 | 27844840 | 582   | ARS_18.3 | 18 | 27752696 | 27753277 | 582   |
| UMD_18.4 | 18 | 39743537 | 39746584 | 3048  | ARS_18.4 | 18 | 39607935 | 39610982 | 3048  |
| UMD_18.5 | 18 | 41972024 | 41972103 | 80    | ARS_18.5 | 18 | 41828736 | 41828815 | 80    |
| UMD_18.6 | 18 | 59834657 | 59835166 | 510   | ARS_18.6 | 18 | 59412752 | 59413261 | 510   |
| UMD_18.7 | 18 | 60053758 | 60054260 | 503   | ARS_18.7 | 18 | 59762045 | 59762547 | 503   |
| UMD_18.8 | 18 | 60063121 | 60063463 | 343   | ARS_18.8 | 18 | 59807938 | 59808280 | 343   |
| UMD_18.9 | 18 | 60176031 | 60177302 | 1272  | ARS_18.9 | 18 | 59867553 | 59868824 | 1272  |
| UMD_19.1 | 19 | 2967720  | 2967907  | 188   | ARS_19.1 | 19 | 2865085  | 2865272  | 188   |
| UMD_19.2 | 19 | 6198111  | 6198238  | 128   | ARS_19.2 | 19 | 5991750  | 5991877  | 128   |
| UMD_19.3 | 19 | 10964054 | 10964363 | 310   | ARS_19.3 | 19 | 10734497 | 10734806 | 310   |
| UMD_19.4 | 19 | 22814079 | 22815406 | 1328  | -        | -  | -        | -        | -     |
| UMD_20.1 | 20 | 6503671  | 6505053  | 1383  | ARS_20.1 | 20 | 6585524  | 6586906  | 1383  |



|          |    |           |           |       |          |    |           |            |       |
|----------|----|-----------|-----------|-------|----------|----|-----------|------------|-------|
| UMD_20.2 | 20 | 8450412   | 8461589   | 11178 | ARS_20.2 | 20 | 8528431   | 8539609    | 11179 |
| UMD_20.3 | 20 | 19880742  | 19880998  | 257   | ARS_20.3 | 20 | 19873588  | 19873844   | 257   |
| UMD_21.1 | 21 | 15119501  | 15119789  | 289   | ARS_21.1 | 21 | 14761903  | 14762191   | 289   |
| UMD_21.2 | 21 | 29334663  | 29334717  | 55    | ARS_21.2 | 21 | 28798166  | 28798220   | 55    |
| UMD_21.3 | 21 | 34241992  | 34242091  | 100   | ARS_21.3 | 21 | 33850846  | 33850945   | 100   |
| UMD_22.1 | 22 | 6960754   | 6995583   | 34830 | ARS_22.1 | 22 | 6888148   | 6922983    | 34836 |
| UMD_22.2 | 22 | 19705582  | 19711621  | 6040  | ARS_22.2 | 22 | 19625034  | 19629899   | 4866  |
| UMD_22.3 | 22 | 47697196  | 47709002  | 11807 | ARS_22.3 | 22 | 47138697  | 47150504   | 11808 |
| UMD_24.1 | 24 | 2303106   | 2303250   | 145   | -        | -  | -         | -          | -     |
| UMD_24.2 | 24 | 12837964  | 12838115  | 152   | ARS_24.2 | 24 | 12538399  | 12538550   | 152   |
| UMD_24.3 | 24 | 14068674  | 14068760  | 87    | ARS_24.3 | 24 | 13764585  | 13764671   | 87    |
| UMD_24.4 | 24 | 36397041  | 36399885  | 2845  | ARS_24.4 | 24 | 35993080  | 35995923   | 2844  |
| UMD_24.5 | 24 | 36805023  | 36805084  | 62    | ARS_24.5 | 24 | 36401697  | 36401758   | 62    |
| UMD_24.6 | 24 | 44095810  | 44098521  | 2712  | ARS_24.6 | 24 | 43654538  | 43657378   | 2841  |
| UMD_24.7 | 24 | 53677566  | 53679448  | 1883  | ARS_24.7 | 24 | 53207391  | 53209273   | 1883  |
| UMD_24.8 | 24 | 61511586  | 61514197  | 2612  | ARS_24.8 | 24 | 61001514  | 61003946   | 2433  |
| UMD_25.1 | 25 | 2602431   | 2602921   | 491   | -        | -  | -         | -          | -     |
| UMD_26.1 | 26 | 21566895  | 21566962  | 68    | ARS_26.1 | 26 | 21698927  | 21698994   | 68    |
| UMD_26.2 | 26 | 25886672  | 25886745  | 74    | ARS_26.2 | 26 | 25659797  | 25659870   | 74    |
| UMD_26.3 | 26 | 28229853  | 28230043  | 191   | ARS_26.3 | 26 | 28050711  | 28050901   | 191   |
| UMD_26.4 | 26 | 28312962  | 28313152  | 191   | -        | -  | -         | -          | -     |
| UMD_26.5 | 26 | 32034952  | 32044769  | 9818  | ARS_26.5 | 26 | 31752082  | 31761878   | 9797  |
| UMD_27.1 | 27 | 4524836   | 4525161   | 326   | ARS_27.1 | 27 | 5656129   | 5656454    | 326   |
| UMD_27.2 | 27 | 15492252  | 15492396  | 145   | ARS_27.2 | 27 | 16435739  | 16435883   | 145   |
| UMD_27.3 | 27 | 36791828  | 36791933  | 106   | ARS_27.3 | 27 | 37106412  | 37106517   | 106   |
| UMD_28.1 | 28 | 2049061   | 2049456   | 396   | ARS_28.1 | 28 | 492427    | 492573     | 147   |
| UMD_28.2 | 28 | 2372583   | 2373248   | 666   | ARS_28.2 | 28 | 825313    | 825708     | 396   |
| UMD_28.3 | 28 | 27793309  | 27794291  | 983   | ARS_28.3 | 28 | 27634869  | 27 635 851 | 983   |
| UMD_28.4 | 28 | 35554699  | 35579985  | 25287 | ARS_28.4 | 28 | 35355283  | 35379236   | 23954 |
| UMD_28.5 | 28 | 39174119  | 39174270  | 152   | ARS_28.5 | 28 | 38944686  | 38944837   | 152   |
| UMD_28.6 | 28 | 42163395  | 42176287  | 12893 | ARS_28.6 | 28 | 41830981  | 41843872   | 12892 |
| UMD_29.1 | 29 | 328507    | 333938    | 5432  | ARS_29.1 | 29 | 354897    | 360137     | 5241  |
| UMD_29.2 | 29 | 14652127  | 14652248  | 122   | ARS_29.2 | 29 | 14565176  | 14565297   | 122   |
| UMD_29.3 | 29 | 35601868  | 35601956  | 89    | ARS_29.3 | 29 | 35020663  | 35020751   | 89    |
| UMD_X.1  | X  | 27385987  | 27386087  | 101   | ARS_X.1  | X  | 27407737  | 27407837   | 101   |
| UMD_X.2  | X  | 41219983  | 41221350  | 1368  | ARS_X.2  | X  | 38546369  | 38546701   | 333   |
| UMD_X.3  | X  | 58182947  | 58184078  | 1132  | -        | -  | -         | -          | -     |
| UMD_X.4  | X  | 80170353  | 80176879  | 6527  | ARS_X.4  | X  | 75132748  | 75139274   | 6527  |
| UMD_X.5  | X  | 110578228 | 110578333 | 106   | ARS_X.5  | X  | 105099177 | 105099282  | 106   |
| UMD_X.6  | X  | 114169713 | 114173028 | 3316  | ARS_X.6  | X  | 108948384 | 108948571  | 188   |
| UMD_X.7  | X  | 114458829 | 114462899 | 4071  | -        | -  | -         | -          | -     |
| UMD_X.8  | X  | 118057033 | 118057287 | 255   | ARS_X.8  | X  | 112806246 | 112806500  | 255   |
| UMD_X.9  | X  | 118082230 | 118083259 | 1030  | ARS_X.9  | X  | 112831022 | 112832051  | 1030  |

77

78 1 The abbreviation "CHR" was used for chromosome.

79 2 The start and end positions of the NUMT regions in the nuclear genome were used to calculate the  
80 length.

81 *Note: in most cases, it was possible to correlate NUMT regions from both assemblies. However in some*  
82 *cases it is difficult or not possible to decide if the NUMT region was present in both assemblies.*

83 **Table S5.** Summary of identified NUMT regions per chromosome.

| Chromosome | UMD_3.1.1 assembly     |                                | ARS-UCD1.2 assembly    |                                |
|------------|------------------------|--------------------------------|------------------------|--------------------------------|
|            | Number of NUMT regions | Total length <sup>1</sup> (bp) | Number of NUMT regions | Total length <sup>1</sup> (bp) |
| 1          | 10                     | 39,988                         | 10                     | 39,980                         |
| 2          | 15                     | 34,327                         | 15                     | 34,388                         |
| 3          | 5                      | 3,869                          | 5                      | 3,869                          |
| 4          | 11                     | 24,894                         | 11                     | 24,426                         |
| 5          | 3                      | 9,108                          | 3                      | 9,109                          |
| 6          | 4                      | 3,318                          | 4                      | 3,318                          |
| 7          | 4                      | 6,996                          | 4                      | 6,996                          |
| 8          | 6                      | 3,014                          | 6                      | 3,014                          |
| 9          | 5                      | 11,410                         | 5                      | 12,200                         |
| 10         | 14                     | 53,846                         | 14                     | 53,421                         |
| 11         | 4                      | 28,983                         | 4                      | 29,792                         |
| 12         | 7                      | 2,534                          | 6                      | 2,015                          |
| 13         | 6                      | 10,761                         | 6                      | 12,988                         |
| 14         | 5                      | 5,841                          | 5                      | 5,841                          |
| 15         | 7                      | 9,712                          | 8                      | 9,947                          |
| 16         | 6                      | 15,700                         | 6                      | 19,211                         |
| 17         | 4                      | 16,716                         | 4                      | 14,394                         |
| 18         | 9                      | 7,135                          | 8                      | 6,431                          |
| 19         | 4                      | 1,954                          | 3                      | 626                            |
| 20         | 3                      | 12,818                         | 3                      | 12,819                         |
| 21         | 3                      | 444                            | 3                      | 444                            |
| 22         | 3                      | 52,677                         | 3                      | 51,510                         |
| 23         | -                      | -                              | -                      | -                              |
| 24         | 8                      | 10,498                         | 7                      | 10,302                         |
| 25         | 1                      | 491                            | -                      | -                              |
| 26         | 5                      | 10,342                         | 4                      | 10,130                         |
| 27         | 3                      | 577                            | 3                      | 577                            |
| 28         | 6                      | 40,377                         | 6                      | 38,524                         |
| 29         | 3                      | 5,643                          | 3                      | 5,452                          |
| X          | 9                      | 17,906                         | 7                      | 8,540                          |
| Total      | 173                    | 441,879                        | 166                    | 430,264                        |

84  
85 *1 The "total length" was calculated by summing the length of the NUMT regions present in each*  
86 *chromosome. The start and end positions of the NUMT regions in the nuclear genome were used to*  
87 *calculate the length of each region. The length of each region can be found in Table S4.*  
88

89  
90  
91

**Table S6.** Information on NUMT regions identified on the ARS-UCD1.2 assembly using LAST compared with NUMT regions found using BLASTN with default parameters.

| NUMT regions, identified using LAST, that do not overlap with the ones identified using BLASTN. |     |                |              |             |
|-------------------------------------------------------------------------------------------------|-----|----------------|--------------|-------------|
| NUMT region                                                                                     | CHR | Start position | End position | Length (bp) |
| ARS_1.3                                                                                         | 1   | 74038942       | 74039056     | 115         |
| ARS_1.4                                                                                         | 1   | 94998201       | 94998277     | 77          |
| ARS_2.8                                                                                         | 2   | 52673849       | 52673988     | 140         |
| ARS_2.12                                                                                        | 2   | 104083158      | 104083273    | 116         |
| ARS_3.2                                                                                         | 3   | 99198342       | 99198477     | 136         |
| ARS_3.3                                                                                         | 3   | 99230430       | 99230751     | 322         |
| ARS_3.4                                                                                         | 3   | 99264028       | 99264355     | 328         |
| ARS_4.11                                                                                        | 4   | 119203491      | 119203545    | 55          |
| ARS_8.1                                                                                         | 8   | 12480290       | 12480637     | 348         |
| ARS_8.2                                                                                         | 8   | 21996578       | 21996644     | 67          |
| ARS_12.1                                                                                        | 12  | 1361751        | 1361967      | 217         |
| ARS_12.6                                                                                        | 12  | 48646882       | 48646948     | 67          |
| ARS_13.3                                                                                        | 13  | 47091490       | 47091601     | 112         |
| ARS_15.8                                                                                        | 15  | 83957438       | 83957672     | 235         |
| ARS_16.6                                                                                        | 16  | 79837757       | 79837898     | 142         |
| ARS_17.1                                                                                        | 17  | 143331         | 143787       | 457         |
| ARS_18.1                                                                                        | 18  | 14566459       | 14566551     | 93          |
| ARS_19.1                                                                                        | 19  | 2865085        | 2865272      | 188         |
| ARS_26.2                                                                                        | 26  | 25659797       | 25659870     | 74          |
| ARS_27.3                                                                                        | 27  | 37106412       | 37106517     | 106         |
| ARS_28.1                                                                                        | 28  | 492427         | 492573       | 147         |
| ARS_29.3                                                                                        | 29  | 35020663       | 35020751     | 89          |
| -                                                                                               | -   | -              | -            | -           |
| -                                                                                               | -   | -              | -            | -           |
| -                                                                                               | -   | -              | -            | -           |
| -                                                                                               | -   | -              | -            | -           |

| NUMT regions, identified using BLASTN, that do not overlap with the ones identified using LAST. |     |                |              |             |
|-------------------------------------------------------------------------------------------------|-----|----------------|--------------|-------------|
| NUMT region                                                                                     | CHR | Start position | End position | Length (bp) |
| -                                                                                               | 1   | 127662613      | 127662655    | 43          |
| -                                                                                               | 2   | 74826206       | 74826488     | 283         |
| -                                                                                               | 7   | 110679201      | 110679786    | 586         |
| -                                                                                               | 8   | 113066625      | 113067210    | 586         |
| -                                                                                               | 9   | 8320570        | 8320680      | 111         |
| -                                                                                               | 9   | 12710035       | 12710830     | 796         |
| -                                                                                               | 11  | 62480940       | 62481233     | 294         |
| -                                                                                               | 14  | 19556538       | 19556600     | 63          |
| -                                                                                               | 14  | 28049025       | 28049189     | 165         |
| -                                                                                               | 15  | 6051307        | 6051622      | 316         |
| -                                                                                               | 15  | 83956479       | 83957122     | 644         |
| -                                                                                               | 16  | 79837058       | 79837651     | 594         |
| -                                                                                               | 17  | 26423806       | 26423875     | 70          |
| -                                                                                               | 18  | 5067400        | 5067431      | 32          |
| -                                                                                               | 18  | 14566629       | 14566815     | 187         |
| -                                                                                               | 18  | 59008564       | 59008764     | 201         |
| -                                                                                               | 18  | 59201573       | 59201732     | 160         |
| -                                                                                               | 18  | 59256340       | 59256499     | 160         |
| -                                                                                               | 18  | 59319315       | 59319589     | 275         |
| -                                                                                               | 18  | 59848143       | 59849408     | 1,266       |
| -                                                                                               | 19  | 4409807        | 4409960      | 154         |
| -                                                                                               | 20  | 51849409       | 51849479     | 71          |
| -                                                                                               | 21  | 52512649       | 52512733     | 85          |
| -                                                                                               | 23  | 37282226       | 37282509     | 284         |
| -                                                                                               | 24  | 13629712       | 13629910     | 199         |
| -                                                                                               | 24  | 48386502       | 48386568     | 67          |

92  
93

94  
95  
96

**Table S7.** Information on NUMT regions identified on the ARS-UCD1.2 Assembly using LAST compared with NUMT regions found using consolidated results of all BLAST searches.

| NUMT regions, identified using LAST, that do not overlap with the ones identified using BLAST searches. |     |                |              |             | NUMT regions, identified using BLAST searches, that do not overlap with the ones identified using LAST. |     |                |              |             |
|---------------------------------------------------------------------------------------------------------|-----|----------------|--------------|-------------|---------------------------------------------------------------------------------------------------------|-----|----------------|--------------|-------------|
| NUMT region                                                                                             | CHR | Start position | End position | Length (bp) | NUMT region                                                                                             | CHR | Start position | End position | Length (bp) |
| ARS_1.3                                                                                                 | 1   | 74038942       | 74039056     | 115         | -                                                                                                       | 1   | 97119345       | 97119990     | 646         |
| ARS_2.12                                                                                                | 2   | 104083158      | 104083273    | 116         | -                                                                                                       | 1   | 127662613      | 127662655    | 43          |
| ARS_3.2                                                                                                 | 3   | 99198342       | 99198477     | 136         | -                                                                                                       | 2   | 74826186       | 74826488     | 303         |
| ARS_3.3                                                                                                 | 3   | 99230430       | 99230751     | 322         | -                                                                                                       | 3   | 37679787       | 37679854     | 68          |
| ARS_3.4                                                                                                 | 3   | 99264028       | 99264355     | 328         | -                                                                                                       | 3   | 99284969       | 99285184     | 216         |
| ARS_4.11                                                                                                | 4   | 119203491      | 119203545    | 55          | -                                                                                                       | 6   | 68426646       | 68427263     | 618         |
| ARS_8.2                                                                                                 | 8   | 21996578       | 21996644     | 67          | -                                                                                                       | 7   | 71900898       | 71901084     | 187         |
| ARS_12.1                                                                                                | 12  | 1361751        | 1361967      | 217         | -                                                                                                       | 7   | 110678938      | 110681611    | 2,674       |
| ARS_12.6                                                                                                | 12  | 48646882       | 48646948     | 67          | -                                                                                                       | 8   | 157571         | 157741       | 171         |
| ARS_13.3                                                                                                | 13  | 47091490       | 47091601     | 112         | -                                                                                                       | 8   | 98095287       | 98095479     | 193         |
| ARS_19.1                                                                                                | 19  | 2865085        | 2865272      | 188         | -                                                                                                       | 8   | 113066362      | 113069035    | 2,674       |
| ARS_27.3                                                                                                | 27  | 37106412       | 37106517     | 106         | -                                                                                                       | 9   | 8320570        | 8320680      | 111         |
| ARS_28.1                                                                                                | 28  | 492427         | 492573       | 147         | -                                                                                                       | 9   | 12709990       | 12711060     | 1071        |
| ARS_29.3                                                                                                | 29  | 35020663       | 35020751     | 89          | -                                                                                                       | 10  | 41467721       | 41467914     | 194         |
| -                                                                                                       | -   | -              | -            | -           | -                                                                                                       | 11  | 62480940       | 62481233     | 294         |
| -                                                                                                       | -   | -              | -            | -           | -                                                                                                       | 12  | 1899398        | 1899565      | 168         |
| -                                                                                                       | -   | -              | -            | -           | -                                                                                                       | 12  | 66290589       | 66290953     | 365         |
| -                                                                                                       | -   | -              | -            | -           | -                                                                                                       | 14  | 19556538       | 19556744     | 207         |
| -                                                                                                       | -   | -              | -            | -           | -                                                                                                       | 14  | 28049025       | 28049240     | 216         |
| -                                                                                                       | -   | -              | -            | -           | -                                                                                                       | 15  | 6051288        | 6051667      | 380         |
| -                                                                                                       | -   | -              | -            | -           | -                                                                                                       | 15  | 46547435       | 46547546     | 112         |
| -                                                                                                       | -   | -              | -            | -           | -                                                                                                       | 15  | 56699713       | 56700183     | 471         |
| -                                                                                                       | -   | -              | -            | -           | -                                                                                                       | 16  | 421778         | 421962       | 185         |
| -                                                                                                       | -   | -              | -            | -           | -                                                                                                       | 17  | 26423806       | 26423875     | 70          |
| -                                                                                                       | -   | -              | -            | -           | -                                                                                                       | 18  | 5067400        | 5067431      | 32          |
| -                                                                                                       | -   | -              | -            | -           | -                                                                                                       | 18  | 8768554        | 8768740      | 187         |
| -                                                                                                       | -   | -              | -            | -           | -                                                                                                       | 18  | 58726970       | 58727230     | 261         |
| -                                                                                                       | -   | -              | -            | -           | -                                                                                                       | 18  | 58843915       | 58844146     | 232         |
| -                                                                                                       | -   | -              | -            | -           | -                                                                                                       | 18  | 58879312       | 58879543     | 232         |
| -                                                                                                       | -   | -              | -            | -           | -                                                                                                       | 18  | 59008564       | 59008803     | 240         |
| -                                                                                                       | -   | -              | -            | -           | -                                                                                                       | 18  | 59077117       | 59077348     | 232         |
| -                                                                                                       | -   | -              | -            | -           | -                                                                                                       | 18  | 59201515       | 59201782     | 268         |
| -                                                                                                       | -   | -              | -            | -           | -                                                                                                       | 18  | 59256307       | 59256551     | 245         |
| -                                                                                                       | -   | -              | -            | -           | -                                                                                                       | 18  | 59319315       | 59319589     | 275         |
| -                                                                                                       | -   | -              | -            | -           | -                                                                                                       | 18  | 59796238       | 59796496     | 259         |
| -                                                                                                       | -   | -              | -            | -           | -                                                                                                       | 18  | 59838284       | 59838542     | 259         |
| -                                                                                                       | -   | -              | -            | -           | -                                                                                                       | 18  | 59848090       | 59849408     | 1,319       |
| -                                                                                                       | -   | -              | -            | -           | -                                                                                                       | 19  | 4409807        | 4409970      | 164         |
| -                                                                                                       | -   | -              | -            | -           | -                                                                                                       | 20  | 51849352       | 51849498     | 147         |

|   |   |   |   |   |
|---|---|---|---|---|
| - | - | - | - | - |
| - | - | - | - | - |
| - | - | - | - | - |
| - | - | - | - | - |
| - | - | - | - | - |
| - | - | - | - | - |
| - | - | - | - | - |
| - | - | - | - | - |
| - | - | - | - | - |
| - | - | - | - | - |
| - | - | - | - | - |
| - | - | - | - | - |
| - | - | - | - | - |
| - | - | - | - | - |
| - | - | - | - | - |
| - | - | - | - | - |
| - | - | - | - | - |
| - | - | - | - | - |
| - | - | - | - | - |
| - | - | - | - | - |
| - | - | - | - | - |
| - | - | - | - | - |
| - | - | - | - | - |

|   |    |           |           |       |
|---|----|-----------|-----------|-------|
| - | 20 | 62160537  | 62160867  | 331   |
| - | 21 | 52512538  | 52512824  | 287   |
| - | 23 | 1117213   | 1117408   | 196   |
| - | 23 | 37282226  | 37282521  | 296   |
| - | 24 | 3330842   | 3331128   | 287   |
| - | 24 | 13629712  | 13629910  | 199   |
| - | 24 | 48386502  | 48386568  | 67    |
| - | 25 | 27515136  | 27515234  | 99    |
| - | 26 | 2832229   | 2832401   | 173   |
| - | 26 | 33015098  | 33015270  | 173   |
| - | 26 | 46166014  | 46166392  | 379   |
| - | 27 | 37093433  | 37094081  | 649   |
| - | 28 | 484082    | 486228    | 2,147 |
| - | 28 | 511309    | 513450    | 2,142 |
| - | X  | 116470822 | 116471410 | 589   |
| - | X  | 120905188 | 120905562 | 375   |
| - | X  | 136773121 | 136773299 | 179   |

97  
98

99 **Table S8.** Repetitive sequences in NUMT regions per class and family.<sup>1</sup>

| Repetitive elements class and family <sup>1</sup> | Flanking region 1kb upstream |                                  |               | NUMT Regions        |                                  |               | Flanking region 1kb downstream |                                  |               |
|---------------------------------------------------|------------------------------|----------------------------------|---------------|---------------------|----------------------------------|---------------|--------------------------------|----------------------------------|---------------|
|                                                   | Number <sub>3</sub>          | Overlap length (pb) <sup>4</sup> | %             | Number <sub>3</sub> | Overlap length (bp) <sup>4</sup> | %             | Number <sub>3</sub>            | Overlap length (bp) <sup>4</sup> | %             |
| <b>DNA</b>                                        | <b>21</b>                    | <b>4,105</b>                     | <b>5,3%</b>   | <b>5</b>            | <b>356</b>                       | <b>0,2%</b>   | <b>23</b>                      | <b>3,810</b>                     | <b>4,7%</b>   |
| hAT                                               | 1                            | 186                              | 0,2%          | 4                   | 311                              | 0,2%          | 1                              | 107                              | 0,1%          |
| TcMar-Mariner                                     | 0                            | 0                                | 0,0%          | 1                   | 45                               | 0,0%          | 3                              | 100                              | 0,1%          |
| hAT-Ac                                            | 0                            | 0                                | 0,0%          | 0                   | 0                                | 0,0%          | 1                              | 68                               | 0,1%          |
| hAT-Blackjack                                     | 1                            | 52                               | 0,1%          | 0                   | 0                                | 0,0%          | 1                              | 98                               | 0,1%          |
| hAT-Charlie                                       | 13                           | 2,645                            | 3,4%          | 0                   | 0                                | 0,0%          | 14                             | 2,711                            | 3,3%          |
| hAT-Tip100                                        | 3                            | 827                              | 1,1%          | 0                   | 0                                | 0,0%          | 1                              | 423                              | 0,5%          |
| TcMar-Tigger                                      | 3                            | 395                              | 0,5%          | 0                   | 0                                | 0,0%          | 2                              | 303                              | 0,4%          |
| <b>LINE</b>                                       | <b>154</b>                   | <b>41,845</b>                    | <b>54,4%</b>  | <b>220</b>          | <b>104,062</b>                   | <b>64,7%</b>  | <b>175</b>                     | <b>45,936</b>                    | <b>56,2%</b>  |
| L1                                                | 69                           | 18,626                           | 24,2%         | 72                  | 41,947                           | 26,1%         | 88                             | 21,759                           | 26,6%         |
| L2                                                | 19                           | 3,347                            | 4,4%          | 1                   | 1                                | 0,0%          | 15                             | 2,575                            | 3,2%          |
| RTE-BovB                                          | 66                           | 19,872                           | 25,9%         | 147                 | 62,114                           | 38,6%         | 69                             | 21,343                           | 26,1%         |
| CR1                                               | 0                            | 0                                | 0,0%          | 0                   | 0                                | 0,0%          | 2                              | 199                              | 0,2%          |
| Penelope                                          | 0                            | 0                                | 0,0%          | 0                   | 0                                | 0,0%          | 1                              | 60                               | 0,1%          |
| <b>Low_complexity</b>                             | <b>8</b>                     | <b>377</b>                       | <b>0,5%</b>   | <b>6</b>            | <b>274</b>                       | <b>0,2%</b>   | <b>5</b>                       | <b>206</b>                       | <b>0,3%</b>   |
| Low_complexity                                    | 8                            | 377                              | 0,5%          | 6                   | 274                              | 0,2%          | 5                              | 206                              | 0,3%          |
| <b>LTR</b>                                        | <b>38</b>                    | <b>9,198</b>                     | <b>12,0%</b>  | <b>39</b>           | <b>6,157</b>                     | <b>3,8%</b>   | <b>33</b>                      | <b>7,055</b>                     | <b>8,6%</b>   |
| ERV1                                              | 12                           | 4,285                            | 5,6%          | 9                   | 2,639                            | 1,6%          | 14                             | 3,257                            | 4,0%          |
| ERVK                                              | 11                           | 1,629                            | 2,1%          | 30                  | 3,518                            | 2,2%          | 8                              | 822                              | 1,0%          |
| ERVL                                              | 9                            | 1,771                            | 2,3%          | 0                   | 0                                | 0,0%          | 4                              | 1,230                            | 1,5%          |
| ERVL-MaLR                                         | 6                            | 1,513                            | 2,0%          | 0                   | 0                                | 0,0%          | 7                              | 1,746                            | 2,1%          |
| <b>Satellite</b>                                  | <b>2</b>                     | <b>746</b>                       | <b>1,0%</b>   | <b>0</b>            | <b>0</b>                         | <b>0,0%</b>   | <b>0</b>                       | <b>0</b>                         | <b>0,0%</b>   |
| centr                                             | 2                            | 746                              | 1,0%          | 0                   | 0                                | 0,0%          | 0                              | 0                                | 0,0%          |
| <b>Simple_repeat</b>                              | <b>34</b>                    | <b>1,213</b>                     | <b>1,6%</b>   | <b>60</b>           | <b>2,176</b>                     | <b>1,4%</b>   | <b>41</b>                      | <b>1,544</b>                     | <b>1,9%</b>   |
| Simple_repeat                                     | 34                           | 1,213                            | 1,6%          | 60                  | 2,176                            | 1,4%          | 41                             | 1,544                            | 1,9%          |
| <b>SINE</b>                                       | <b>138</b>                   | <b>19,137</b>                    | <b>24,9%</b>  | <b>302</b>          | <b>44,303</b>                    | <b>27,6%</b>  | <b>164</b>                     | <b>22,958</b>                    | <b>28,1%</b>  |
| Core-RTE                                          | 26                           | 4,538                            | 5,9%          | 72                  | 13,985                           | 8,7%          | 33                             | 5,855                            | 7,2%          |
| MIR                                               | 18                           | 2,227                            | 2,9%          | 2                   | 206                              | 0,1%          | 17                             | 1,877                            | 2,3%          |
| tRNA                                              | 16                           | 2,206                            | 2,9%          | 26                  | 4,221                            | 2,6%          | 18                             | 2,603                            | 3,2%          |
| tRNA-Core-RTE                                     | 78                           | 10,166                           | 13,2%         | 202                 | 25,891                           | 16,1%         | 96                             | 12,623                           | 15,4%         |
| <b>snRNA</b>                                      | <b>0</b>                     | <b>0</b>                         | <b>0,0%</b>   | <b>1</b>            | <b>107</b>                       | <b>0,1%</b>   | <b>0</b>                       | <b>0</b>                         | <b>0,0%</b>   |
| snRNA                                             | 0                            | 0                                | 0,0%          | 1                   | 107                              | 0,1%          | 0                              | 0                                | 0,0%          |
| <b>tRNA</b>                                       | <b>0</b>                     | <b>0</b>                         | <b>0,0%</b>   | <b>48</b>           | <b>3,300</b>                     | <b>2,1%</b>   | <b>3</b>                       | <b>207</b>                       | <b>0,3%</b>   |
| tRNA                                              | 0                            | 0                                | 0,0%          | 48                  | 3,300                            | 2,1%          | 3                              | 207                              | 0,3%          |
| <b>Other</b>                                      | <b>3</b>                     | <b>249</b>                       | <b>0,3%</b>   | <b>0</b>            | <b>0</b>                         | <b>0,0%</b>   | <b>0</b>                       | <b>0</b>                         | <b>0,0%</b>   |
| Other                                             | 3                            | 249                              | 0,3%          | 0                   | 0                                | 0,0%          | 0                              | 0                                | 0,0%          |
| <b>Total</b>                                      | <b>398</b>                   | <b>76,870</b>                    | <b>100,0%</b> | <b>681</b>          | <b>160,735</b>                   | <b>100,0%</b> | <b>456</b>                     | <b>81,716</b>                    | <b>100,0%</b> |

100 *1 Repetitive sequence's position and classification were retrieved from the database BovineMine v1.6*

101 *(<http://128.206.116.13:8080/bovinemine/begin.do>).*

102 *2 Family and/or class not specified or unknown.*

103 *3 Number of repetitive sequences.*

104 *4 Overlap between the repetitive sequence position and the NUMT region position.*

105 **Table S9.** NUMT regions located within gene boundaries.

| Gene stable ID or NUMT region ID | CHR <sup>1</sup> | Gene or NUMT region start | Gene or NUMT region end | Size (bp) | Strand | Gene description                                                                 |
|----------------------------------|------------------|---------------------------|-------------------------|-----------|--------|----------------------------------------------------------------------------------|
| ENSBTAG00000018994               | 1                | 94 985 031                | 95 001 222              | 16192     | 1      | TNF superfamily member 10 [Source:VGNC Symbol;Acc:VGNC:36172]                    |
| ARS_1.4                          | 1                | 94 998 201                | 94 998 277              | 77        |        |                                                                                  |
| ENSBTAG00000049521               | 1                | 116 535 664               | 116 535 939             | 276       | -1     |                                                                                  |
| ARS_1.7                          | 1                | 116 533 243               | 116 557 613             | 24371     |        |                                                                                  |
| ENSBTAG00000003833               | 1                | 132 298 308               | 132 334 597             | 36290     | -1     | solute carrier family 35 member G2 [Source:VGNC Symbol;Acc:VGNC:34837]           |
| ARS_1.9                          | 1                | 132 309 962               | 132 310 402             | 441       |        |                                                                                  |
| ENSBTAG00000052593               | 2                | 2 097 072                 | 2 097 178               | 107       | 1      |                                                                                  |
| ARS_2.2                          | 2                | 2 085 710                 | 2 100 413               | 14704     |        |                                                                                  |
| ENSBTAG00000049463               | 2                | 3 387 277                 | 3 387 540               | 264       | 1      |                                                                                  |
| ARS_2.3                          | 2                | 3 386 219                 | 3 391 182               | 4964      |        |                                                                                  |
| ENSBTAG00000018795               | 2                | 6 460 095                 | 6 592 355               | 132261    | -1     | PMS1 homolog 1, mismatch repair system component [VGNC;Acc:VGNC:33077]           |
| ARS_2.5                          | 2                | 6 480 665                 | 6 481 007               | 343       |        |                                                                                  |
| ENSBTAG00000006970               | 2                | 22 528 224                | 22 693 132              | 164909    | 1      | Obg like ATPase 1 [Source:VGNC Symbol;Acc:VGNC:32416]                            |
| ARS_2.6                          | 2                | 22 650 482                | 22 650 987              | 506       |        |                                                                                  |
| ENSBTAG00000001132               | 2                | 52 388 547                | 52 825 730              | 437184    | 1      | glycosyltransferase like domain containing 1 [Source:VGNC Symbol;Acc:VGNC:29690] |
| ARS_2.8                          | 2                | 52 673 849                | 52 673 988              | 140       |        |                                                                                  |
| ENSBTAG00000050589               | 2                | 52 561 468                | 52 794 962              | 233495    | -1     |                                                                                  |
| ARS_2.8                          | 2                | 52 673 849                | 52 673 988              | 140       |        |                                                                                  |
| ENSBTAG00000020696               | 2                | 84 741 175                | 85 088 822              | 347648    | -1     | HECT, C2 and WW domain containing E3 ligase 2 [VGNC; Acc:VGNC:56116]             |
| ARS_2.10                         | 2                | 84 940 388                | 84 941 126              | 739       |        |                                                                                  |
| ENSBTAG00000017436               | 2                | 90 045 394                | 90 168 893              | 123500    | -1     | C2 calcium dependent domain containing 6 [Source:VGNC Symbol;Acc:VGNC:26637]     |
| ARS_2.11                         | 2                | 90 077 160                | 90 086 791              | 9632      |        |                                                                                  |
| ENSBTAG00000010413               | 2                | 104 067 181               | 104 128 350             | 61170     | 1      | transmembrane protein 169 [Source:VGNC Symbol;Acc:VGNC:35994]                    |
| ARS_2.12                         | 2                | 104 083 158               | 104 083 273             | 116       |        |                                                                                  |
| ENSBTAG00000006821               | 2                | 104 068 554               | 104 116 082             | 47529     | -1     | peroxisomal trans-2-enoyl-CoA reductase [Source:VGNC Symbol;Acc:VGNC:32738]      |
| ARS_2.12                         | 2                | 104 083 158               | 104 083 273             | 116       |        |                                                                                  |



|                    |   |             |             |        |    |                                                                                   |
|--------------------|---|-------------|-------------|--------|----|-----------------------------------------------------------------------------------|
| ENSBTAG00000016572 | 2 | 106 447 346 | 106 532 901 | 85556  | -1 | ubiquitin specific peptidase 37 [Source:VGNC Symbol;Acc:VGNC:36726]               |
| ARS_2.13           | 2 | 106 463 510 | 106 463 701 | 192    |    |                                                                                   |
| ENSBTAG00000000229 | 3 | 99 242 275  | 99 264 955  | 22681  | 1  | cytochrome P450 4A25-like [Source:NCBI gene;Acc:784417]                           |
| ARS_3.4            | 3 | 99 264 028  | 99 264 355  | 328    |    |                                                                                   |
| ENSBTAG00000020869 | 4 | 5 336 436   | 5 441 308   | 104873 | 1  | dopa decarboxylase [Source:VGNC Symbol;Acc:VGNC:55748]                            |
| ARS_4.1            | 4 | 5 366 685   | 5 367 374   | 690    |    |                                                                                   |
| ENSBTAG00000007680 | 4 | 19 514 202  | 19 990 379  | 476178 | -1 | thrombospondin type 1 domain containing 7A [Source:VGNC Symbol;Acc:VGNC:35850]    |
| ARS_4.2            | 4 | 19 758 601  | 19 758 717  | 117    |    |                                                                                   |
| ENSBTAG00000015073 | 4 | 24 500 692  | 24 921 062  | 420371 | -1 | isoprenoid synthase domain containing [Source:VGNC Symbol;Acc:VGNC:30303]         |
| ARS_4.4            | 4 | 24 652 762  | 24 652 875  | 114    |    |                                                                                   |
| ENSBTAG00000021182 | 4 | 56 119 633  | 56 598 768  | 479136 | 1  | dedicator of cytokinesis 4 [Source:VGNC Symbol;Acc:VGNC:28158]                    |
| ARS_4.7            | 4 | 56 374 325  | 56 375 395  | 1071   |    |                                                                                   |
| ENSBTAG00000032121 | 4 | 80 159 127  | 80 928 936  | 769810 | -1 | succinyl-CoA:glutarate-CoA transferase [Source:VGNC Symbol;Acc:VGNC:35462]        |
| ARS_4.8            | 4 | 80 267 172  | 80 267 348  | 177    |    |                                                                                   |
| ENSBTAG00000013976 | 4 | 98 689 853  | 98 789 432  | 99580  | 1  | ATP/GTP binding protein like 3 [Source:VGNC Symbol;Acc:VGNC:25722]                |
| ARS_4.9            | 4 | 98 710 770  | 98 718 689  | 7920   |    |                                                                                   |
| ENSBTAG00000021761 | 4 | 104 027 627 | 104 194 547 | 166921 | -1 | B-Raf proto-oncogene, serine/threonine kinase [Source:VGNC Symbol;Acc:VGNC:26551] |
| ARS_4.10           | 4 | 104 035 179 | 104 035 249 | 71     |    |                                                                                   |
| ENSBTAG00000004958 | 4 | 118 732 679 | 119 258 101 | 525423 | -1 | protein tyrosine phosphatase, receptor type N2 [Source:NCBI gene;Acc:616515]      |
| ARS_4.11           | 4 | 119 203 491 | 119 203 545 | 55     |    |                                                                                   |
| ENSBTAG00000003748 | 5 | 43 134 292  | 43 266 434  | 132143 | -1 | CCR4-NOT transcription complex subunit 2 [Source:VGNC Symbol;Acc:VGNC:27517]      |
| ARS_5.2            | 5 | 43 182 930  | 43 183 102  | 173    |    |                                                                                   |
| ENSBTAG00000002972 | 5 | 84 818 340  | 84 887 228  | 68889  | 1  | cancer susceptibility 1 [Source:NCBI gene;Acc:526444]                             |
| ARS_5.3            | 5 | 84 845 707  | 84 850 507  | 4801   |    |                                                                                   |
| ENSBTAG00000019808 | 6 | 33 504 739  | 34 501 208  | 996470 | -1 | coiled-coil serine rich protein 1 [Source:VGNC Symbol;Acc:VGNC:26993]             |
| ARS_6.1            | 6 | 34 113 156  | 34 113 551  | 396    |    |                                                                                   |
| ENSBTAG00000011817 | 6 | 64 820 535  | 64 960 787  | 140253 | -1 | gamma-aminobutyric acid type A receptor alpha2 subunit [NCBI gene;Acc:282236]     |
| ARS_6.2            | 6 | 64 877 892  | 64 877 985  | 94     |    |                                                                                   |
| ENSBTAG00000044044 | 6 | 70 874 084  | 70 978 580  | 104497 | -1 | clock circadian regulator [Source:VGNC Symbol;Acc:VGNC:27456]                     |
| ARS_6.3            | 6 | 70 953 991  | 70 956 717  | 2727   |    |                                                                                   |

|                     |    |             |             |        |    |                                                                           |
|---------------------|----|-------------|-------------|--------|----|---------------------------------------------------------------------------|
| ENSBTAG00000003652  | 6  | 104 853 328 | 104 868 645 | 15318  | 1  | transmembrane protein 128 [Source:VGNC Symbol;Acc:VGNC:35961]             |
| ARS_6.4             | 6  | 104 868 249 | 104 868 349 | 101    |    |                                                                           |
| ENSBTAG000000054972 | 9  | 4 621 622   | 4 621 918   | 297    | -1 |                                                                           |
| ARS_9.1             | 9  | 4 620 016   | 4 631 438   | 11423  |    |                                                                           |
| ENSBTAG000000052141 | 9  | 4 628 627   | 4 633 122   | 4496   | -1 |                                                                           |
| ARS_9.1             | 9  | 4 620 016   | 4 631 438   | 11423  |    |                                                                           |
| ENSBTAG00000007388  | 9  | 86 692 238  | 86 726 552  | 34315  | -1 | zinc finger CCCH-type containing 12D [Source:VGNC Symbol;Acc:VGNC:37100]  |
| ARS_9.4             | 9  | 86 696 116  | 86 696 365  | 250    |    |                                                                           |
| ENSBTAG00000009679  | 9  | 87 781 650  | 87 966 376  | 184727 | 1  | pleckstrin homology and RhoGEF domain containing G1 [VGNC;Acc:VGNC:33014] |
| ARS_9.5             | 9  | 87 933 259  | 87 933 534  | 276    |    |                                                                           |
| ENSBTAG000000034998 | 10 | 5 026 117   | 5 109 495   | 83379  | -1 | SUMO interacting motifs containing 1 [Source:VGNC Symbol;Acc:VGNC:54482]  |
| ARS_10.1            | 10 | 5 035 087   | 5 039 122   | 4036   |    |                                                                           |
| ENSBTAG00000004990  | 10 | 19 888 399  | 20 126 828  | 238430 | 1  | neogenin 1 [Source:VGNC Symbol;Acc:VGNC:32007]                            |
| ARS_10.3            | 10 | 19 956 795  | 19 957 302  | 508    |    |                                                                           |
| ENSBTAG000000021945 | 10 | 44 846 568  | 44 939 145  | 92578  | -1 | nidogen 2 [Source:VGNC Symbol;Acc:VGNC:32074]                             |
| ARS_10.4            | 10 | 44 886 476  | 44 904 484  | 18009  |    |                                                                           |
| ENSBTAG000000025522 | 10 | 55 636 874  | 56 319 410  | 682537 | -1 | unc-13 homolog C [Source:VGNC Symbol;Acc:VGNC:36665]                      |
| ARS_10.9            | 10 | 55 715 617  | 55 721 487  | 5871   |    |                                                                           |
| ENSBTAG000000030881 | 10 | 69 005 149  | 69 075 633  | 70485  | 1  | transmembrane protein 260 [Source:VGNC Symbol;Acc:VGNC:36069]             |
| ARS_10.13           | 10 | 69 055 010  | 69 055 662  | 653    |    |                                                                           |
| ENSBTAG000000025898 | 11 | 5 978 170   | 6 119 371   | 141202 | -1 | TBC1 domain family member 8 [Source:VGNC Symbol;Acc:VGNC:35645]           |
| ARS_11.1            | 11 | 6 096 889   | 6 096 958   | 70     |    |                                                                           |
| ENSBTAG000000019134 | 12 | 21 443 115  | 21 543 353  | 100239 | -1 | NIMA related kinase 5 [Source:VGNC Symbol;Acc:VGNC:31996]                 |
| ARS_12.3            | 12 | 21 466 683  | 21 466 825  | 143    |    |                                                                           |
| ENSBTAG000000008647 | 12 | 43 998 992  | 44 525 321  | 526330 | -1 | kelch like family member 1 [Source:VGNC Symbol;Acc:VGNC:53821]            |
| ARS_12.5            | 12 | 44 140 180  | 44 140 395  | 216    |    |                                                                           |
| ENSBTAG000000044007 | 12 | 48 526 712  | 48 803 497  | 276786 | -1 | Kruppel like factor 12 [Source:VGNC Symbol;Acc:VGNC:30628]                |
| ARS_12.6            | 12 | 48 646 882  | 48 646 948  | 67     |    |                                                                           |
| ENSBTAG000000003955 | 15 | 56 532 192  | 56 637 170  | 104979 | 1  | myosin VIIA [Source:VGNC Symbol;Acc:VGNC:31830]                           |
| ARS_15.6            | 15 | 56 630 034  | 56 635 329  | 5296   |    |                                                                           |

|                    |    |             |             |        |    |                                                                                   |
|--------------------|----|-------------|-------------|--------|----|-----------------------------------------------------------------------------------|
| ENSBTAG00000049875 | 16 | 818 146     | 818 352     | 207    | -1 |                                                                                   |
| ARS_16.1           | 16 | 817 986     | 829 794     | 11809  |    |                                                                                   |
| ENSBTAG00000048925 | 16 | 819 140     | 819 436     | 297    | -1 |                                                                                   |
| ARS_16.1           | 16 | 817 986     | 829 794     | 11809  |    |                                                                                   |
| ENSBTAG00000050274 | 16 | 820 704     | 820 967     | 264    | -1 |                                                                                   |
| ARS_16.1           | 16 | 817 986     | 829 794     | 11809  |    |                                                                                   |
| ENSBTAG00000033056 | 16 | 34 429 413  | 34 853 620  | 424208 | 1  | phospholipase D family member 5 [Source:VGNC Symbol;Acc:VGNC:32999]               |
| ARS_16.3           | 16 | 34 799 081  | 34 799 372  | 292    |    |                                                                                   |
| ENSBTAG00000052192 | 18 | 14 557 133  | 14 566 670  | 9538   | 1  | spermatogenesis associated 33 [Source:NCBI gene;Acc:100848931]                    |
| ARS_18.1           | 18 | 14 566 459  | 14 566 551  | 93     |    |                                                                                   |
| ENSBTAG00000049640 | 18 | 59 391 349  | 59 414 228  | 22880  | -1 |                                                                                   |
| ARS_18.6           | 18 | 59 412 752  | 59 413 261  | 510    |    |                                                                                   |
| ENSBTAG00000011623 | 19 | 10 674 179  | 10 802 801  | 128623 | 1  | vacuole membrane protein 1 [Source:VGNC Symbol;Acc:VGNC:36806]                    |
| ARS_19.3           | 19 | 10 734 497  | 10 734 806  | 310    |    |                                                                                   |
| ENSBTAG00000007651 | 21 | 28 759 374  | 28 803 585  | 44212  | 1  | threonyl-tRNA synthetase like 2 [Source:VGNC Symbol;Acc:VGNC:35606]               |
| ARS_21.2           | 21 | 28 798 166  | 28 798 220  | 55     |    |                                                                                   |
| ENSBTAG00000010027 | 22 | 47 133 914  | 47 158 681  | 24768  | 1  | choline dehydrogenase [Source:VGNC Symbol;Acc:VGNC:27285]                         |
| ARS_22.3           | 22 | 47 138 697  | 47 150 504  | 11808  |    |                                                                                   |
| ENSBTAG00000004612 | 26 | 25 203 123  | 26 181 296  | 978174 | 1  | sortilin related VPS10 domain containing receptor 3 [Source:NCBI gene;Acc:531405] |
| ARS_26.2           | 26 | 25 659 797  | 25 659 870  | 74     |    |                                                                                   |
| ENSBTAG00000054529 | 26 | 31 755 445  | 31 755 732  | 288    | 1  |                                                                                   |
| ARS_26.5           | 26 | 31 752 082  | 31 761 878  | 9797   |    |                                                                                   |
| ENSBTAG00000011032 | 27 | 5 446 148   | 5 686 242   | 240095 | 1  | microcephalin 1 [Source:VGNC Symbol;Acc:VGNC:31321]                               |
| ARS_27.1           | 27 | 5 656 129   | 5 656 454   | 326    |    |                                                                                   |
| ENSBTAG00000020657 | 27 | 16 420 193  | 16 546 078  | 125886 | -1 | FAT atypical cadherin 1 [Source:VGNC Symbol;Acc:VGNC:52771]                       |
| ARS_27.2           | 27 | 16 435 739  | 16 435 883  | 145    |    |                                                                                   |
| ENSBTAG00000021497 | 28 | 27 570 723  | 27 963 222  | 392500 | 1  | cadherin related 23 [Source:NCBI gene;Acc:784716]                                 |
| ARS_28.3           | 28 | 27 634 869  | 27 635 851  | 983    |    |                                                                                   |
| ENSBTAG00000004280 | X  | 105 052 662 | 105 194 351 | 141690 | 1  | sushi repeat containing protein X-linked [Source:VGNC Symbol;Acc:VGNC:50570]      |
| ARS_X.5            | X  | 105 099 177 | 105 099 282 | 106    |    |                                                                                   |

106 1 CHR was used for chromosome.

107 **Figure S1.** Dot plots of potentially highly modified NUMT regions.<sup>1</sup>

108

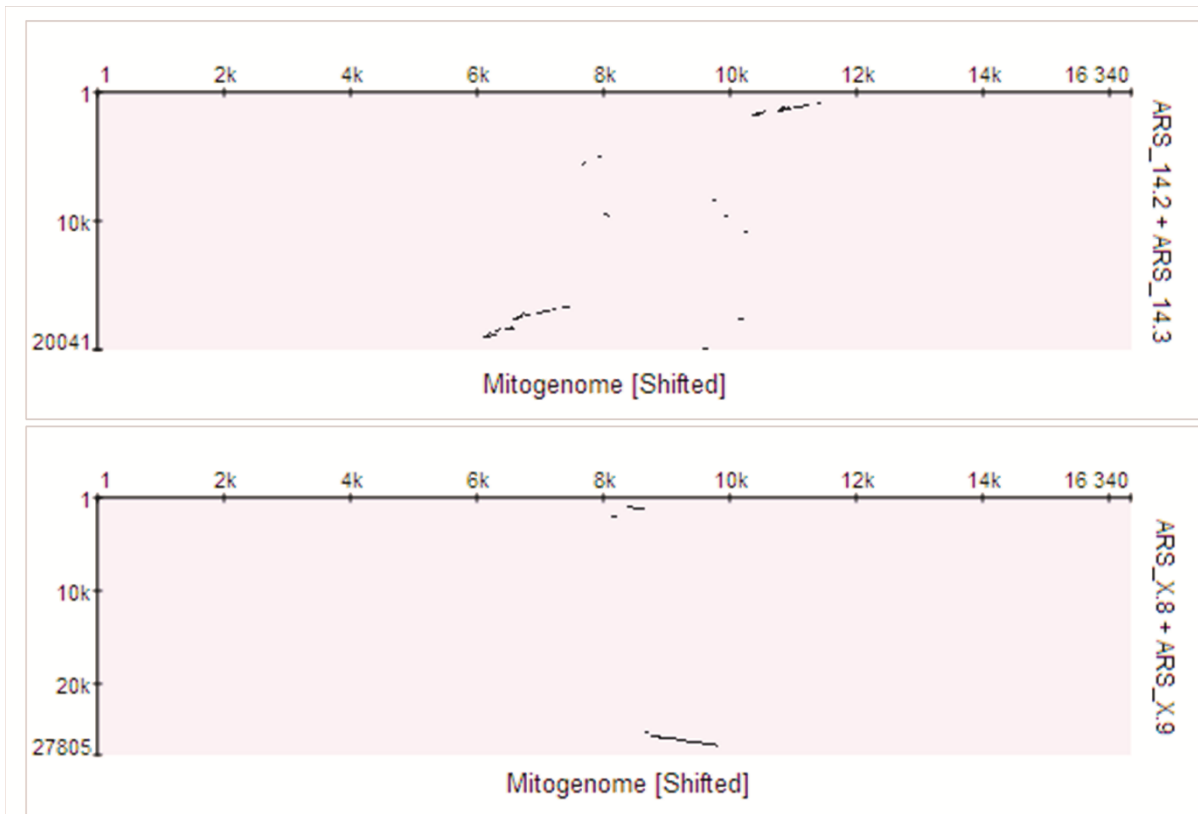

109

110

111 *1 Examples are based on results obtained from NUMTs discovered with the ARS\_UCD1.2 genome*  
112 *assembly. Mitochondrial DNA sequence is plotted on X axis and NUMT regions are plotted on Y axis.*  
113 *The positions indicated in the axes of the dot plots start at 1 and go to the complete length of each*  
114 *sequence. Therefore, dot plot representations are not in the same scale for the Y axis and the position of*  
115 *the shifted representation of the mitochondrial DNA is not adjusted for linearization cut-point.*

116 **Figure S2.** Alignment between NUMT regions ARS\_10.7 and ARS\_10.8, including 500 bp up- and  
 117 downstream of each region. Sequence from ARS-UCD1.2 assembly was used, and repetitive  
 118 sequences were marked in gray.<sup>1</sup>

```

119
120 ARS_10.7  --TTTCAGTTCTGTTCAACAACAAAAAAGAAATGACAATACCTACTACATAACAATGCAC
121 ARS_10.8  GTTTTTCAGTTCTGTTCAACAACAAAAAAGAAATGACAATACCTACTACATAACAATGCAC
122          *****
123
124 ARS_10.7  ACCACACACATGATACATTATACAGTACCATGCTAAGCCACATTGAAGTGAGGCAAAGAA
125 ARS_10.8  ACCACACACATGATACATTATACAGTACCGTGCTAAGCCACATTGAAGTGAGGCAAAGAA
126          *****
127
128 ARS_10.7  AAATCAAGACTACCAAAAAAATAAATAAATAAAAAATCAAGACTACCAATCCTGTAGTTGT
129 ARS_10.8  AAATCAAGCCTACCAAAAAAATAAATAAATAAAAAATCAAGACTACCAATCCTGTAGTT--
130          *****
131
132 ARS_10.7  TGAAATTTTTGATATTTTGTTCATCACTGATTTTTGGTGTTAATTGTCATTTTCAAAT
133 ARS_10.8  -GAAATTTTTGATATTTTGTTCATCACTGATTTTTGGTGTTAATTGTCATTTTCAAAGT
134          *****
135
136 ARS_10.7  ATTGCATTAATAATTATATTTATCTTCATTACTGAGTGTTTGGGGCACCCCTTAAATTC
137 ARS_10.8  ACTACATTAATAATTATATTTATCTTCATTACTGAGTGTTTGGGGCACCCCTTAAATTC
138          * * *****
139
140 ARS_10.7  ACACTTAAGTGCTTTACCTCACATGGGCCCTATGTAGCTCTGATGCTATAATAGCCAGTG
141 ARS_10.8  ACACTTAAGTGCTTTACCTCACGTGGGCCCTATCTAGCTCTGATGCTATAATAGCCAGTG
142          *****
143
144 ARS_10.7  TTTATGTATCAGGCTCTAGGCTAAATGCTTTACCTATAGTATTTGATTTATTCCTTGCAA
145 ARS_10.8  TTTATGTATCAGGCTCTAGGCTAAATGCTTTACCTATAGTATTTGATTTATTCCTTGCAA
146          *****
147
148 ARS_10.7  CAATCCATGAATAAAACTGAGACTTAAAGACATTACTAAGTCTTGTCCTCAAGTCCCAAAGC
149 ARS_10.8  CAATCCATGAATAAAACTGAGACTTAAAGACATTACTAAGTCTTGTCCTCAAGTCCCAAAGC
150          *****
151
152 ARS_10.7  TGTTTAGCACTAGAA-GAACAAATACACAGATGAAGAATATGGAGGCTCTGTTTGCATGT
153 ARS_10.8  TGTTTAGCAGTAGAAAGAACAAATACCCAGATAAAGAATACGGAGGCTCTGTTTGCATGT
154          *****
155
156 ARS_10.7  AAGTTTCAGATAAATTCATCTGTAGCTCATGGGCAGATAGGAGTCGTGGCTGAAAAGGTAG
157 ARS_10.8  AAGTTTCAGATAAATTCATCTGTAGCTCGTGGGCAGATAGGAGTCGTGGCTGAAAAGGTAG
158          *****
159
160 ARS_10.7  TTACTGT---GTCTGATGTTTA-----GACTCCTGCTGGGATTTGCAATGTTAGGCA
161 ARS_10.8  TTACTGTCTGATGTAGAGTATAACTAGAAAGACTCCTGCTGGGATTTGCAATATTAGGCA
162          *****
163
164 ARS_10.7  GATTTCTAACAGTGGGAATTTTCATCATGATAAGATATTTGACAGGGCTCGTAGATCAATA
165 ARS_10.8  TATTTCTAACAGTGGGAATTTTCATCATGATAAGATATTTGACAGGGCTTGTAGATCAATA
166          *****
167
168 ARS_10.7  AATTAATTGGCAATAATCTTGATTCGTGGGTGGGATTTTCAGAGGTTGGTATTTGATGTT
169 ARS_10.8  AACTAATTGGCAATAATCTTGATTCGTGGGTGGGATTTTCAGAGGTTGGTATTTGATGTT
170          ** *****
171
172 ARS_10.7  TCTGTATTTGAAATATAATGACAATTTTTTCATGTTATTGGCCCTAGTCAGATTTTCATGTA
173 ARS_10.8  TCTGTATTTGAAATATAATGACAATTTTTTCATGTTATTGGCCCTAGTCAGATATTCATGTA
174          *****
175
176 ARS_10.7  AAAATAGTAACAGAGAAAACGAAATAGATACAGTATAACTTTTAAGTACTATTTGTGTGG
177 ARS_10.8  AAAATAGTAATAGAGAAAACGAAATAGATACAGTATAAATTTTAAGTACTATTTGTGTGG
178          *****
179
180 ARS_10.7  AATTTGAAGTACTATATAGTGGAATTTGAACCTGGGACTTCTGATGCCACGGCCTATTT
181 ARS_10.8  AATTTGAAGTACTATATAGTGGAATTTGAACCTGGGCACTTTTGTATGCCATGGCCTGTTT
182          *****
183
184

```

```

185 ARS_10.7 TTTAACCAGATGATGCTGGATGGCCTTCCGATGACCACATCAGTCTGGGAGGGAACAATG
186 ARS_10.8 TTTAACCAGATGATGCTGGATGGCCTTCCGATGACCACATCAGTCTGGGAGAGAACAATG
187 *****
188
189 ARS_10.7 CATCACAAACTTCAGTACATAAAGCATGTGGAAACATGAATTGTGAATAAATGCAGTTTT
190 ARS_10.8 CATCACAAACTTCAGTACATAGAGCGTGTGGAAACGTGAATTGTGAATAAATGCTGTTTT
191 *****
192
193 ARS_10.7 TGTTCCCCTTTTCTTCCCCCAAGGATTGCACCTATCAGAGAATATGAAGAGTAACATATA
194 ARS_10.8 TGTTCCCCTTTTCTTCCCCCAAGGATTGCACCTATCAGAGAATATGAAGAGTAACATATA
195 *****
196
197 ARS_10.7 AAAAAATTTTATTTGGGGGAGAGCAAATTAATTTTAACTCTGATTTCTT-----
198 ARS_10.8 AAAAAATTTTATTTGGGGGAGAGCAAATTAATTTTAACTCTGATTTCTTTTTTTTTTTT
199 *****
200
201 ARS_10.7 -----ACCCCTTCACCCAGGTCTACCCCTGGAAAAGAGTGAAGATTTA
202 ARS_10.8 TTAACACTCTGATTTCTTACCCCTTCACCCAGGTCTACACTGGAAAAGAATGAAGATTTA
203 *****
204
205 ARS_10.7 GTGTCATTTTCCAAATGAACCTGATAAAAGCATCTTTAGTTTGATATACAAAGAACCAAA
206 ARS_10.8 GTGTCATTTTCCAAATGAACCTGATAAAAGCATCTTTAGTTTGATATACAAAGAGCCAAA
207 *****
208
209 ARS_10.7 AGCATTTTGGGATTTGAGCACCTTCTTAAATAATGAACTGAACCAAGAGCTTT
210 ARS_10.8 AGCATTTTGGGATTTGAGCACCTTCTTAAATA-----
211 *****
212

```

213 *I Assembly sequence was recovered from NCBI with masked sequences in lower case letters. This masking*  
214 *was used as a reference to mark repetitive regions above.*  
215

216 **Figure S3.** Alignment between NUMT regions ARS\_18.6, ARS\_18.7 and ARS\_18.8, including 500 bp up-  
 217 and downstream of each region. Sequence from ARS-UCD1.2 assembly was used, and  
 218 repetitive sequences were marked in gray.

```

219
220 ARS_18.7 -----ACACATACACCATTTCATAGGGCTCATCCAGAGGCCGAAACTTGCCCTCCTCT
221 ARS_18.8 -----ACACATACACCATTTCATAGGGCTCATCCAGAGGCCGAAACTTGCCCTCCTCT
222 ARS_18.6 TTGCAACACACGCATACACCATTTCATAGGGCTCATCCAGAGGCCGAAACTTGCCCTCCTCT
223          ** *****
224
225 ARS_18.7 CACAACCTCTCCTAGACCCCAATAGCTTCCTCTCCACTTTCCACATGTTTTCACTACTT
226 ARS_18.8 CACAACCTCTCCTAGACCCCAATAGCTTCCTCTCCACTTTCCACATGTTTTCACTACTT
227 ARS_18.6 CACAACCTCTCCTAGACCCCTGATAGCTTCCTCTCCGCTTTCCACATGTTTTCACTACTT
228          ***** ***** *****
229
230 ARS_18.7 TTCTGTGCTCTGTTGAGCAACAGGGCTAAACAGCAGAGACCACTGGGCCTGGGCAACACA
231 ARS_18.8 TTCTGTGCTCTGTTGAGCAACAGGGCTAAACAGCAGAGACCACTGGGCCTGGGCAACACA
232 ARS_18.6 TTCTGTGCTCTATTGAGCAACAGGGCTAAACAGTAGAGACCACGGGGCCTGGGCAACACA
233          ***** ***** ***** *****
234
235 ARS_18.7 CAGAAAACACACAAGCCGCAAATGCAAGGGCACTGGGCACTCAGTATGGAGACCAAGAAA
236 ARS_18.8 CAGAAAACACACAAGCCGCAAATGCAAGAGCACTGGGCACTCAGTATGGAGACCAAGAAA
237 ARS_18.6 CA-AAAACACACAAGCCACAAATGCAAGGGCACTGGGCACTCAGTATGGAGACCAAGAAA
238          ** *****
239
240 ARS_18.7 CTGGCCCTCTTGGGAAAACATGCCAGGAAGTGG-GATATCACGAAGTTTTAAAGGTGTTT
241 ARS_18.8 CTGGCCCTCTTGGGAAAACATACCAGGAAGTGG-GATATCACGAAGTTTTAAAGGTGTTT
242 ARS_18.6 CTGGCCCTCTTGGGAAAGCATGCCAGGAAGTGGAGATATCACAAAGTTTTAAAGGTCTTT
243          ***** ***** ** ***** ***** ***** **
244
245 ARS_18.7 GAGATTTGGCTCGACTGAGCTCAGTGAAGAAGTCACAGAAAAGGCCCAATCTCACTGC
246 ARS_18.8 GAGATTTAGCTCGACTGAGCTCAGTGAAGAAGTCACAGAAAAGGCCCAATCTCACTGC
247 ARS_18.6 GAGATTTGGCTCGATTGAGCTCAGTGAAGAAGTCTCAGAGAAAAGGCCCAATCTCACTGC
248          ***** ***** ***** ***** *****
249
250 ARS_18.7 CGCCTGTTGTACCTGACTGACCTAATTGGAAGATACCCAGCTCTTTAAGGAAGCGGGGC
251 ARS_18.8 CGCCTGTTGTACCTGACTGACCTAATTGGAAGATACCCAGCTCTTTAAGGAAGCGGGGC
252 ARS_18.6 CGCCTGTTGTCTCTGACTGACCTAATTGGAAGATACCCAGCTCTTTAAGGAAGCGGGGC
253          ***** ***** ***** ***** *****
254
255 ARS_18.7 CTCCTTCATAGCCCCTTAGATGCCAAAGCTTCTGGCAACTCTAACCACAGTAAAATCAGT
256 ARS_18.8 CTCCTTCATAGCCCCTTAGATGCCAAAGCTTCTGGCAACTCTAACCACAGTAAAATCAGT
257 ARS_18.6 CTCCTTCATAGCCCCTTAGATTCCAAAGCTTCTGGC-----CACAGTAAAACCAGT
258          ***** ***** ***** ***** *****
259
260 ARS_18.7 ATCCCCACTCTGAGTAGATAAACTGCTGAAAGCAATGTGTTTCCCCACTACAGCCCTCA
261 ARS_18.8 ATCCCCACTCTGAGTAGATAAACTGCTGAAAGCAATGTGTTTCCCCACTACAGCCCTCA
262 ARS_18.6 ATCCCCACTCTGAGTAGATAAAACCGCTGAAAGCAATGAGTTTCCCTACTACAGCCCTCA
263          ***** ***** ***** ***** *****
264
265 ARS_18.7 TTATGAAGTCTCCATTAACAGGATTACCAATCCTCACAGGCTTCAATTCCTAAGATCTT
266 ARS_18.8 TTATGAAGTCTCCATTAACAGGATTACCAATCCTCACAGGCTTCAATTCCTAAGATCTT
267 ARS_18.6 TTATGAAGTCTCCATTAACAGGATTACCAATCCTCACAGGCTTCCATTCCTAAGATCTT
268          ***** ***** ***** ***** *****
269
270 ARS_18.7 ATTATCCAATCAGCCCACATGTTGCACACCAAGACCAGAGCCT-----CTGTCTCTA
271 ARS_18.8 ATTATCCAATCAGCCCACATGTTGCACACCAAGACCAGAGCCT-----CTGTCTCTA
272 ARS_18.6 ATTATCCAATCAGCCCACATGTTGCACACCAAGACCTGAGCCTATTAATAACCTGATTA
273          ***** ***** ***** * * **
274
275 ARS_18.7 CACCCACACAGCTGTGTACAGCACTCGTGTCACTGGCTTCACAATTCCTAGGACAATCTCC
276 ARS_18.8 CACCCACACAGCTGTGTACAGCACTCGTGTCACTGGCTTCACAATTCCTAGGACAACCTCC
277 ARS_18.6 CACCCACACAGCTGCGTACAGCACTGGTGTCACTGGCTTCACAATTCCTAGGACAACCTCC
278          ***** ***** ***** ***** *****
279
280 ARS_18.7 CTTCTCCGATTAATTTTAATTAATGAAGACAACCCACTCCTACTCAACTCTATCAAAGGT
281 ARS_18.8 CTTCTCCGATTAATTTTAATTAATGAAGACAACCCACTCCTACTCAACTCTATCAAAGGT
282 ARS_18.6 CTTCTCCAGTTAATTTTAATTAATGAAAACAACCCACTCCTACTCAACTCTATCAAAGGT
283          ***** ***** ***** ***** *****

```

284  
285 ARS\_18.7 CTGTTAGCTAGAAGCATTGTTGAACCAATTTTTTT--ATCTCTGACAATATTACACCAACAA  
286 ARS\_18.8 CTGTTAGCTAGAAGCATTGTTGAACCAATTTTTTT--ATCTCTGACAATATTACACCAACAA  
287 ARS\_18.6 CTGTTAGCTAGAAGCATTGTTCAACCAGTTTTTTTTTATCTCTGACAATATTCCACCAACAA  
288 \*\*\*\*\*  
289  
290 ARS\_18.7 CATTGCCACAAATAAACAGGCCTCGTTACTTCAAGCAAACCTGTTTCCTTTTCCACCTGCCC  
291 ARS\_18.8 CATTGCCACAAATAAACAGGCCTCGTTACTTCAAGCAAACCTGTTTCCTTTTCCACCTGCCC  
292 ARS\_18.6 CATTCCCACAAATAAACAGGCCTCATTACTTGAAGCTAACTGCTCCTTGTCACCTGCCC  
293 \*\*\*\*  
294  
295 ARS\_18.7 CACATAATCATCTTAGGTTTGTAGTGTAGCACTGACAATCAACCTTAATGCACAAAATCTAA  
296 ARS\_18.8 CACATAATCATCTTAGGTTTGTAGTGTAGCACTGACAATCAACCTTAATGCACAAA-TCTAA  
297 ARS\_18.6 CACATAATCA---TAGGTTTGTAGTGTAGCACTGACAGTCAACCTTGATGCACAAAATCTAA  
298 \*\*\*\*\*  
299  
300 ARS\_18.7 AACTATCCCTCAACTGTCTTCAGATTCTCCGATCTCTTAAGATATTTCCCCACTATTATA  
301 ARS\_18.8 AACTATCCCTCAACTGTCTTCAGATTCTCCGATCTCTTAAGATATTTCCCCACTATTATA  
302 ARS\_18.6 AACTATCCCTCAAATGTCTTCAGATTCTCCGATCTCTTAAGATATTTCCCCACTATTATA  
303 \*\*\*\*\*  
304  
305 ARS\_18.7 CACCCTTTCCATTGCACTTGTGAGCAATCCATAATTCAGCATTATCCACACTGGGTCTC  
306 ARS\_18.8 -ACCCTTTCCATTGCACTTGTGAGCAATCCATAATTCAGCATTATCCACACTGGGTCTC  
307 ARS\_18.6 CACCCTTTCCACTGCACTTGTGAGCAGTCCATAATT-AGCATTATCCACACTGGGTCTC  
308 \*\*\*  
309  
310 ARS\_18.7 ACTGACTGGAAAACCTACCAACCAACGTTCACTTTTTAAAATTCAAAATAAAACACTAGTATC  
311 ARS\_18.8 ACTGACTGGAAAACCTACCAACCAACGTTCACTTTTTAAAATTCAAAATAAAACACTAGTATC  
312 ARS\_18.6 ACTGACTGGAAAACCTACCAACCAAAACTCACTCCTTTAATTCAAAATAAAACACTAGTATC  
313 \*\*\*\*\* \*  
314  
315 ARS\_18.7 AGACCAAAGAGGCTTCCAGGTGGCTCAGTGGTAAGAAATCCTCCTTCCAATGAAGGAGA  
316 ARS\_18.8 AGACCAAAGAGGCTTCCAGGTGGCTCAGTGGTAAGAAATCCTCCTTCCAATGAAGGAGA  
317 ARS\_18.6 AGACCAAAGAGGCTTCCAGGTGGCTCAGTGGTAAC-AATCCTCCTGCCAAT---GGAGA  
318 \*\*\*\*\*  
319  
320 ARS\_18.7 TGCAAGAGATGGGGGTTTTATCCCTGAGTCAGAAGATCCACAGGATTAGGAAATGGCAGC  
321 ARS\_18.8 TGAAAGAGATGGGGGTTTTATCCCTGAGTCAGAAGATCCACAGGATTAGGAAATGGCAGC  
322 ARS\_18.6 TGCAAGAAATGGGGGTTTTATCCCTGAGTCAGAAGATCCCAGGATTAGGAAATGGCAAC  
323 \*\* \*  
324  
325 ARS\_18.7 CGACTCCAGTATTCTTGCTGGGAATTCATGGACACAGCAGCCTGGAAGGCTACACTC  
326 ARS\_18.8 CCACTCCAGTATTCTTGCTGGGAATTCATGGACACAGCAGCCTGGAAGGCTACACTC  
327 ARS\_18.6 CCACTCCAGTATTCTTGCTGGGAATTCATGGACACAGGAGCCTGGCGGGCTACACTC  
328 \*  
329  
330 ARS\_18.7 CATGGGGTCTCA--GAGTCGGAATGTCTGAGCATAGAGACCATTATATTTTCTTTG  
331 ARS\_18.8 CATGGGGTCTCAAAGAGTCGGAATGTCTGAGTATAGAGACCAT-----  
332 ARS\_18.6 CATGGGGTCTCAAAGAGTCGGAATGTCTGAGGATAGAGACCATTATATTTTCTTTG  
333 \*\*\*\*\*  
334  
335 ARS\_18.7 ATTCTAGAGCTCATATCAGTAACCAGCATCACTGAAAATTATCTCCTAAAATGAACAGTC  
336 ARS\_18.8 -----  
337 ARS\_18.6 ATTCTGGAGCTCATAACCAGTAACCAGCATCACTGAAAATAATCTCCTAAAGTGAAGAGCC  
338  
339  
340 ARS\_18.7 TCTC--GTCAATTTATTACCCTGGTCATATAAACAGAAAAGGACAGTAATACGCCTCCC  
341 ARS\_18.8 -----  
342 ARS\_18.6 TCTGTAGTCAATTTATTACCCTGGTCATATAAACAGAAAAGGACAGTAATACGCCTCCC  
343  
344  
345 ARS\_18.7 TAACACTCGAGAAAGAACTCCAGCTC-  
346 ARS\_18.8 -----  
347 ARS\_18.6 TAACACTCGAGAAAGAACTCCAGCGCC  
348

349 *I* Assembly sequence was recovered from NCBI with masked sequences in lower case letters. This masking  
350 was used as a reference to mark repetitive regions above.



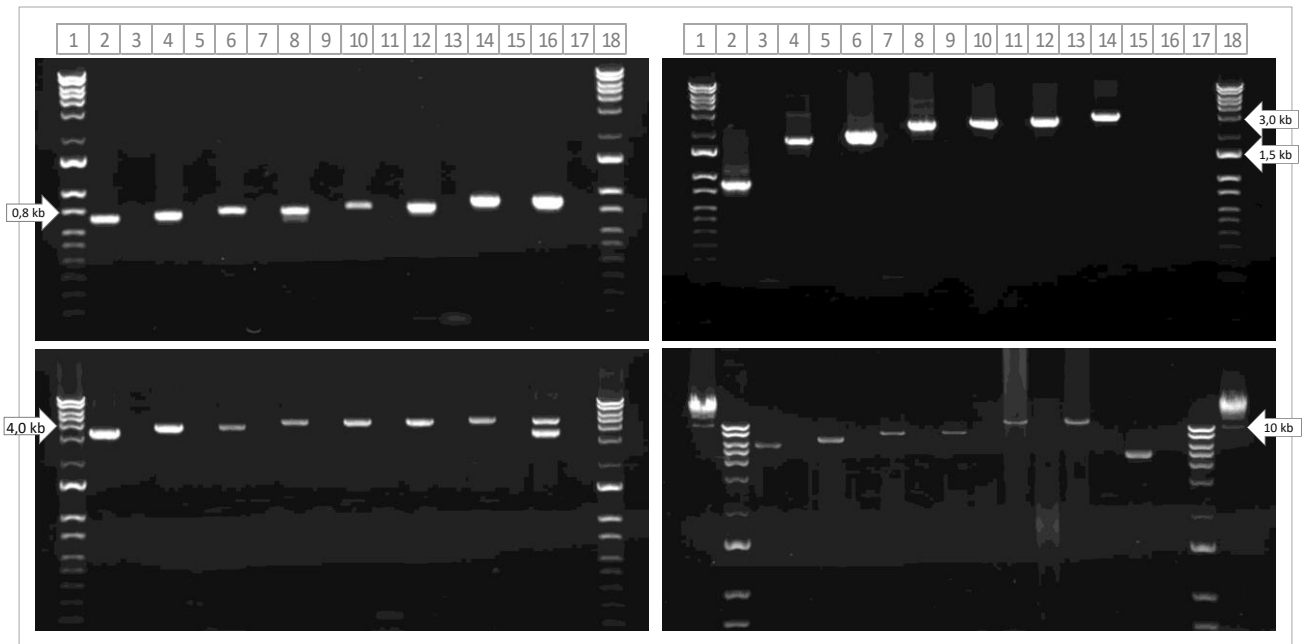

351  
 352  
 353  
 354  
 355  
 356  
 357  
 358  
 359  
 360  
 361  
 362  
 363  
 364  
 365  
 366

**Figure S4.** PCR amplification of 29 NUMT regions with genomic DNA from L1 Dominette 01449. On the right of each amplicon, the respective negative control was charged. On the top-left gel, 8 NUMT regions, from left to right: UMD\_28.2, UMD\_1.5, UMD\_27.1, UMD\_14.1, UMD\_8.6, UMD\_2.5, UMD\_10.8 and UMD\_15.B. On the top-right gel, 7 NUMT regions, from left to right: UMD\_15.7, UMD\_11.3, UMD\_20.1, UMD\_18.9, UMD\_4.5, UMD\_2.4 and UMD\_24.7. On the bottom-left gel, 8 NUMT regions, from left to right: UMD\_8.4, UMD\_6.3, UMD\_3.1, UMD\_15.2, UMD\_18.4, UMD\_5.1, UMD\_24.6 and UMD\_X.2. On the bottom-right gel, 6 NUMT regions, from left to right: UMD\_2.3, UMD\_10.1, UMD\_12.4, UMD\_4.9, UMD\_10.10 and UMD\_2.11. ExactLadder DNA PreMix 2 Log (Ozyme) was used in all gels (lanes 2 and 17 for the bottom-right gel and lanes 1 and 18 for the other three gels). For the bottom-right gel, was used an additional ladder on lanes 1 and 18 (Lambda DNA Mono Cut Mix from New England Biolabs) and a reference amplicon of 5 kb on lane 15.

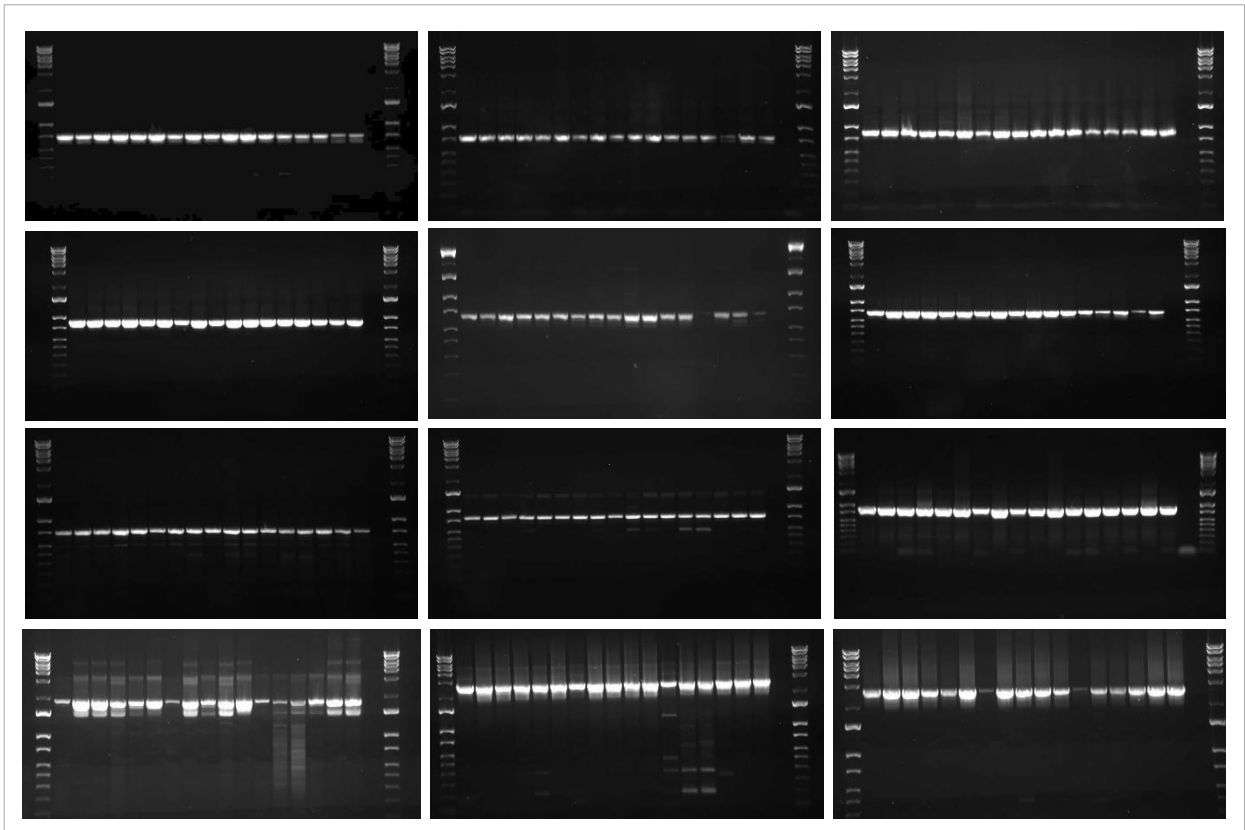

367  
 368 **Figure S5.** PCR amplification of 12 NUMT regions with genomic DNA from Dominette and other 7  
 369 breeds in a total of 17 animals<sup>1</sup>.  
 370 One NUMT region is presented in each gel, from left to right:  
 371 - on the first row: UMD\_14.1, UMD\_2.5 and UMD\_10.8;  
 372 - on the second row: UMD\_15.B, UMD\_28.2 and UMD\_1.5;  
 373 - on the third row: UMD\_27.1, UMD\_8.6 and UMD\_15.7;  
 374 - on the fourth row UMD\_11.3, UMD\_18.9 and UMD\_4.5.  
 375 ExactLadder DNA PreMix 2 Log DNA marker (Ozyme) was used in all gels (lanes 1 and 20).  
 376 On lane 19, the negative control was charged.  
 377  
 378 *1 Breeds: Hereford (1), Montbéliarde (3), Holstein (3), Normande (2), Limousine (1), Salers (2), Blonde*  
 379 *d'Aquitaine (3), and Aubrac (2). Number of samples between brackets. Breeds are listed in the order of*  
 380 *the amplicons on the gel.*  
 381  
 382

383 **Figure S6.** Alignment of sequences obtained for amplicon UMD\_15.B.

```

384
385
386 MON_UMD_15B-R+      AAAAAAAGTTTTAATTCTCTCCCTTTCCCTTATTACACTAATGTTAAACTTATGTCTACT
387 NOR_UMD_15B-R+      AACTTATGTCTACT
388 AUB_UMD_15B-R+      AACTTATGTCTACT
389
390 consensus          AAAAAAAGTTTTAATTCTCTCCCTTTCCCTTATTACACTAATGTTAAACTTATGTCTACT
391
392
393 MON_UMD_15B-R+      . : . : . : . : . : . :
394 NOR_UMD_15B-R+      TAATTTCCATGAGTAATCTCCATAACAACAAAATTACTAAAAAATAAAGATCAACCACCA
395 NOR_UMD_15B-F-      AATTACTAAAAAATAAAGATCAACCACCA
396 AUB_UMD_15B-R+      TAATTTCCATGAGTAATCTCCATAACAACAAAATTACTAAAAAATAAAGATCAACCACCA
397 AUB_UMD_15B-F-      ACAAATTACTAAAAAATAAAGATCAACCACCA
398 BLA_UMD_15B-F-      TAAAAAATAAAGATCAACCACCA
399 HOL_UMD_15B-R+      TTCCATGAGTAATCTCCATAACAACAAAATTACTAAAAAATAAAGATCAACCACCA
400
401 consensus          TAATTTCCATGAGTAATCTCCATAACAACAAAATTACTAAAAAATAAAGATCAACCACCA
402
403
404 MON_UMD_15B-R+      . : . : . : . : . : . :
405 NOR_UMD_15B-R+      ACCACCCTCATCATAGCTATATCTGCAGCTATTCCCTATAGTATCTTCACTAAAAATCCA
406 NOR_UMD_15B-F-      ACCACCCTCATCATAGCTATATCTGCAGCTATTCCCTATAGTATCTTCACTAAAAATCCA
407 AUB_UMD_15B-R+      ACCACCCTCATCATAGCTATATCTGCAGCTATTCCCTATAGTATCTTCACTAAAAATCCA
408 AUB_UMD_15B-F-      ACCACCCTCATCATAGCTATATCTGCAGCTATTCCCTATAGTATCTTCACTAAAAATCCA
409 BLA_UMD_15B-F-      ACCACCCTCATCATAGCTATATCTGCAGCTATTCCCTATAGTATCTTCACTAAAAATCCA
410 HOL_UMD_15B-R+      ACCACCCTCATCATAGCTATATCTGCAGCTATTCCCTATAGTATCTTCACTAAAAATCCA
411
412 consensus          ACCACCCTCATCATAGCTATATCTGCAGCTATTCCCTATAGTATCTTCACTAAAAATCCA
413
414
415 MON_UMD_15B-R+      . : . : . : . : . : . :
416 NOR_UMD_15B-R+      GCATCTCCAGTATCATAAATTACTCAGTCTCCTATGCCATAAAAAGTCAAATACCAATGCC
417 NOR_UMD_15B-F-      GCATCTCCAGTATCATAAATTACTCAGTCTCCTATGCCATAAAAAGTCAAATACCAATGCC
418 AUB_UMD_15B-R+      GCATCTCCAGTATCATAAATTACTCAGTCTCCTATGCCATAAAAAGTCAAATACCAATGCC
419 AUB_UMD_15B-F-      GCATCTCCAGTATCATAAATTACTCAGTCTCCTATGCCATAAAAAGTCAAATACCAATGCC
420 BLA_UMD_15B-F-      GCATCTCCAGTATCATAAATTACTCAGTCTCCTATGCCATAAAAAGTCAAATACCAATGCC
421 HOL_UMD_15B-R+      GCATCTCCAGTATCATAAATTACTCAGTCTCCTATGCCATAAAAAGTCAAATACCAATGCC
422
423 consensus          GCATCTCCAGTATCATAAATTACTCAGTCTCCTATGCCATAAAAAGTCAAATACCAATGCC
424
425
426 MON_UMD_15B-R+      . : . : . : . : . : . :
427 NOR_UMD_15B-R+      ATCTCATTGTTTTTATAAATCACAGAACTACTGAACTTCTATTAATAAGCCCAAAGAA
428 NOR_UMD_15B-F-      ATCTCATTGTTTTTATAAATCACAGAACTACTGAACTTCTATTAATAAGCCCAAAGAA
429 AUB_UMD_15B-R+      ATCTCATTGTTTTTATAAATCACAGAACTACTGAACTTCTATTAATAAGCCCTAAAGAA
430 AUB_UMD_15B-F-      ATCTCATTGTTTTTATAAATCACAGAACTACTGAACTTCTATTAATAAGCCCTAAAGAA
431 BLA_UMD_15B-F-      ATCTCATTGTTTTTATAAATCACAGAACTACTGAACTTCTATTAATAAGCCCTAAAGAA
432 HOL_UMD_15B-R+      ATCTCATTGTTTTTATAAATCACAGAACTACTGAACTTCTATTAATAAGCCCAAAGAA
433 BLA_UMD_15B-R+      ATCACAGAACTACTGAACTTCTATTAATAAGCCCTAAAGAA
434
435 consensus          ATCTCATTGTTTTTATAAATCACAGAACTACTGAACTTCTATTAATAAGCCCAAAGAA
436
437
438 MON_UMD_15B-R+      . : . : . : . : . : . :
439 NOR_UMD_15B-R+      ACATTCTAAAACGACAATAATGAACTCAAATATCAGGGTATTCTTTTAGTAGCTATAG
440 NOR_UMD_15B-F-      ACATTCTAAAACGACAATAATGAACTCAAATATCAGGGTATTCTTTTAGTAGCTATAG
441 AUB_UMD_15B-R+      ACATTCTAAAACGACAATAATGAACTCAAATATCAGGGTATTCTTTTAGTAGCTATAG
442 AUB_UMD_15B-F-      ACATTCTAAAACGACAATAATGAACTCAAATATCAGGGTATTCTTTTAGTAGCTATAG
443 BLA_UMD_15B-F-      ACATTCTAAAACGACAATAATGAACTCAAATATCAGGGTATTCTTTTAGTAGCTATAG
444 HOL_UMD_15B-R+      ACATTCTAAAACGACAATAATGAACTCAAATATCAGGGTATTCTTTTAGTAGCTATAG
445 BLA_UMD_15B-R+      ACATTCTAAAACGACAATAATGAACTCAAATATCAGGGTATTCTTTTAGTAGCTATAG
446
447 consensus          ACATTCTAAAACGACAATAATGAACTCAAATATCAGGGTATTCTTTTAGTAGCTATAG
448
449
450 MON_UMD_15B-R+      . : . : . : . : . : . :
451 NOR_UMD_15B-R+      CTGTGGTATAACAAGAAGTCACCAATATTCCTCTCTTTCTGCACTTTTTGACAACCTGAC
452 NOR_UMD_15B-F-      CTGTGGTATAACAAGAAGTCACCAATATTCCTCTCTTTCTGCACTTTTTGACAACCTGAC

```

453 AUB\_UMD\_15B-R+ CTGTGGTATAACAAGAAGTCACCAATATTCCCTCTCTTTCTGCACCTTTTTGACAACCTGAC  
454 AUB\_UMD\_15B-F- CTGTGGTATAACAAGAAGTCACCAATATTCCCTCTCTTTCTGCACCTTTTTGACAACCTGAC  
455 BLA\_UMD\_15B-F- CTGTGGTATAACAAGAAGTCACCAATATTCCCTCTCTTTCTGCACCTTTTTGACAACCTGAC  
456 HOL\_UMD\_15B-R+ CTGTGGTATAACAAGAAGTCACCAATATTCCCTCTCTTTCTGCACCTTTTTGACAACCTGAC  
457 BLA\_UMD\_15B-R+ CTGTGGTATAACAAGAAGTCACCAATATTCCCTCTCTTTCTGCACCTTTTTGACAACCTGAC  
458  
459 consensus CTGTGGTATAACAAGAAGTCACCAATATTCCCTCTCTTTCTGCACCTTTTTGACAACCTGAC  
460  
461  
462 . : . : . : . : . : . :  
462 MON\_UMD\_15B-R+ AGTTGAAAAGAGGCCTTGAGAAACAGGGGTTTAGGAAGAATACTAAGTTTAGAACTCTCC  
463 NOR\_UMD\_15B-R+ AGTTGAAAAGAGGCCTTGAGAAACAGGGGTTTAGGAAGAATACTAAGTTTAGAACTCTCC  
464 NOR\_UMD\_15B-F- AGTTGAAAAGAGGCCTTGAGAAACAGGGGTTTAGGAAGAATACTAAGTTTAGAACTCTCC  
465 AUB\_UMD\_15B-R+ AGTTGAAAAGAGGCCTTGAGAAACAGGGGTTTAGGAAGAATACTAAGTTTAGAACTCTCC  
466 AUB\_UMD\_15B-F- AGTTGAAAAGAGGCCTTGAGAAACAGGGGTTTAGGAAGAATACTAAGTTTAGAACTCTCC  
467 BLA\_UMD\_15B-F- AGTTGAAAAGAGGCCTTGAGAAACAGGGGTTTAGGAAGAATACTAAGTTTAGAACTCTCC  
468 HOL\_UMD\_15B-R+ AGTTGAAAAGAGGCCTTGAGAAACAGGGGTTTAGGAAGAATACTAAGTTTAGAACTCTCC  
469 BLA\_UMD\_15B-R+ AGTTGAAAAGAGGCCTTGAGAAACAGGGGTTTAGGAAGAATACTAAGTTTAGAACTCTCC  
470  
471 consensus AGTTGAAAAGAGGCCTTGAGAAACAGGGGTTTAGGAAGAATACTAAGTTTAGAACTCTCC  
472  
473 . : . : . : . : . : . :  
474 MON\_UMD\_15B-R+ ACCCATCTACCTATGCACCTGATTATTCATCTGTGAATCCATCCATCCATGCACAACCTA  
475 NOR\_UMD\_15B-R+ ACCCATCTACCTATGCACCTGATTATTCATCTGTGAATCCATCCATCCATGCACAACCTA  
476 NOR\_UMD\_15B-F- ACCCATCTACCTATGCACCTGATTATTCATCTGTGAATCCATCCATCCATGCACAACCTA  
477 AUB\_UMD\_15B-R+ ACCCATCTACCTATGCACCTGATTATTCATCTGTGAATCCATCCATCCATGCACAACCTA  
478 AUB\_UMD\_15B-F- ACCCATCTACCTATGCACCTGATTATTCATCTGTGAATCCATCCATCCATGCACAACCTA  
479 BLA\_UMD\_15B-F- ACCCATCTACCTATGCACCTGATTA  
480 HOL\_UMD\_15B-R+ ACCCATCTACCTATGCACCTGATTATTCATCTGTGAATCCATCCATCCATGCACAACCTA  
481 BLA\_UMD\_15B-R+ ACCCATCTACCTATGCACCTGATTATTCATCTGTGAATCCATCCATCCATGCACAACCTA  
482  
483 consensus ACCCATCTACCTATGCACCTGATTATTCATCTGTGAATCCATCCATCCATGCACAACCTA  
484  
485 . : . : . : . : . : . :  
486 MON\_UMD\_15B-R+ TCTGTCCATCTTTCCATCTACCCAACCCTCTTTAACAAATATTTATTGAGAATATACTAT  
487 NOR\_UMD\_15B-R+ TCTGTCCATCTTTCCATCTACCCAACCCTCTTTAACAAATATTTATTGAGAATATACTAT  
488 NOR\_UMD\_15B-F- TCTGTCCATCTTTCCATCTACCCAACCCTCTTTAACAAATATTTATTGAGAATATACTAT  
489 AUB\_UMD\_15B-R+ TCTGTCCATCTTTCCATCTACCCAACCCTCTTTAACAAATATTTATTGAGAATATACTAT  
490 AUB\_UMD\_15B-F- TCTGTCCATCTTTCCATCTACCCAACCCTCTTTAACAAATATTTATTGAGAATATACTAT  
491 HOL\_UMD\_15B-R+ TCTGTCCATCTTTCCATCTACCCAACCCTCTTTAACAAATATTTATTGAGAATATACTAT  
492 BLA\_UMD\_15B-R+ TCTGTCCATCTTTCCATCTACCCAACCCTCTTTAACAAATATTTATTGAGAATATACTAT  
493  
494 consensus TCTGTCCATCTTTCCATCTACCCAACCCTCTTTAACAAATATTTATTGAGAATATACTAT  
495  
496 . : . : . : . : . : . :  
497 MON\_UMD\_15B-R+ GGACTCCCAGTAGGGATACAGAAGTGAATAAAGTAGAAATCAGAGAAATCTGGGCTGATG  
498 NOR\_UMD\_15B-R+ GGACTCCCAGTAGGGATACAGAAGTGAATAAAGTAGAAATCAGAGAAATCTGGGCTGATG  
499 NOR\_UMD\_15B-F- GGACTCCCAGTAGGGATACAGAAGTGAATAAAGTAGAAATCAGAGAAATCTGGGCTGATG  
500 AUB\_UMD\_15B-R+ GGACTCCCAGTAGGGATACAGAAGTGAATAAAGTAGAAATCAGAGAAATCTGGGCTGATG  
501 AUB\_UMD\_15B-F- GGACTCCCAGTAGGGATACAGAAGTGAATAAAGTAGAAATCAGAGAAATCTGGGCTGATG  
502 HOL\_UMD\_15B-R+ GGACTCCCAGTAGGGATACAGAAGTGAATAAAGTAGAAATCAGAGAAATCTGGGCTGATG  
503 BLA\_UMD\_15B-R+ GGACTCCCAGTAGGGATACAGAAGTGAATAAAGTAGAAATCAGAGAAATCTGGGCTGATG  
504  
505 consensus GGACTCCCAGTAGGGATACAGAAGTGAATAAAGTAGAAATCAGAGAAATCTGGGCTGATG  
506  
507 . : . : . : . : . : . :  
508 MON\_UMD\_15B-R+ TCATAACTCAGTCACTTAATACAACCTGTGTTACCTTGTAAGTTTTGTGTTCTCTTGAGC  
509 NOR\_UMD\_15B-R+ TCATAACTCAGTCACTTAATACAACCTGTGTTACCTTGTAAGTTTTGTGTTCTCTTGAGC  
510 NOR\_UMD\_15B-F- TCATAACTCAGTCACTTAATACAACCTGTGTTACCTTGTAAGTTTTGTGTTCTCTTGAGC  
511 AUB\_UMD\_15B-R+ TCATAACTCAGTCACTTAATACAACCTGTGTTACCTTGTAAGTTTTGTGTTCTCTTGAGC  
512 AUB\_UMD\_15B-F- TCATAACTCAGTCACTTAATACAACCTGTGTTACCTTGTAAGTTTTGTGTTCTCTTGAGC  
513 HOL\_UMD\_15B-R+ TCATAACTCAGTCACTTAATACAACCTGTGTTACCTTGTAAGTTTTGTGTTCTCTTGAGC  
514 BLA\_UMD\_15B-R+ TCATAACTCAGTCACTTAATACAACCTGTGTTACCTTGTAAGTTTTGTGTTCTCTTGAGC  
515  
516 consensus TCATAACTCAGTCACTTAATACAACCTGTGTTACCTTGTAAGTTTTGTGTTCTCTTGAGC  
517  
518 . : . : . : . : . : . :  
519 MON\_UMD\_15B-R+ TTCTGTCTTCATCTGTAAATTTGGATTCTAACTCTGCTTCACAGTAAAAGGATTAGAA  
520 NOR\_UMD\_15B-R+ TTCTGTCTTCATCTGTAAATTTGGATTCTAACTCTGCTTCACAGTAAAAGGATTAGAA  
521 NOR\_UMD\_15B-F- TTCTGTCTTCATCTGTAAATTTGGATTCTAACTCTGCTTCACAGTAAAAGGATTAGAA  
522 AUB\_UMD\_15B-R+ TTCTGTCTTCATCTGTAAATTTGGATTCTAACTCTGCTTCACAGTAAAAGGATTAGAA  
523 AUB\_UMD\_15B-F- TTCTGTCTTCATCTGTAAATTTGGATTCTAACTCTGCTTCACAGTAAAAGGATTAGAA

```

524 HOL_UMD_15B-R+ TTCTGTCTTCATCTGTAAATTTGGATTCTAACTCTGCTTCACAGTGAAAAGGATTAGAA
525 BLA_UMD_15B-R+ TTCTGTCTTCATCTGTAAATTTGGATTCTAACTCTGCTTCACAGTGAAAAGGATTAGAA
526
527 consensus TTCTGTCTTCATCTGTAAATTTGGATTCTAACTCTGCTTCACAGTGAAAAGGATTAGAA
528
529 . : . : . : . : . :
530 MON_UMD_15B-R+ GAAATACTGGACTTATATAGAAAACAGCCCAGTGGCAAGAGCATTGTAGGTACCCCC
531 NOR_UMD_15B-R+ GAAATACTGGACTTATATAGAAAACAGCCCAGTGGCAAGAGCATTGTAGGTACCCCC
532 NOR_UMD_15B-F- GAAATACTGGACTTATATAGA
533 AUB_UMD_15B-R+ GAAATACTGGACTTATATAGAAAACAGCCCAGTGGCAAGAGCATTGTAGGTACCCCC
534 AUB_UMD_15B-F- GAAATACTGGACTTAT
535 HOL_UMD_15B-R+ GAAATACTGGACTTATATAGAAAACAGCCCAGTGGCAAGAGCATTGTAGGTACCCCC
536 BLA_UMD_15B-R+ GAAATACTGGACTTATATAGAAAACAGCCCAGTGGCAAGAGCATTGTAGGTACCCCCCAA
537
538 consensus GAAATACTGGACTTATATAGAAAACAGCCCAGTGGCAAGAGCATTGTAGGTACCCCCCAA
539
540 . : . : . : . : . :
541 BLA_UMD_15B-R+ ACAGTAGCTTTGCATGTGGG
542
543 consensus ACAGTAGCTTTGCATGTGGG
544

```
